# Supplementary material
Source: Royal Society of Chemistry journal article supplement (doi:10.1039/d6qi00670a)
Supplement: d6qi00670a1.pdf [file d6qi00670a1.pdf]

**SUPPORTING INFORMATION**

Disobedient Boron Clusters: Synthesis, Structure and  
Bonding of Hypoelectronic Open and *Closo*  
Osmaborane Clusters

*Ketaki Kar, Suvam Saha, Deepak Kumar Patel and Sundargopal Ghosh\**

*Department of Chemistry, Indian Institute of Technology Madras, Chennai 600036, India. Tel: +91 44-22574230; Fax: +91 44-22574202; E-mail: [sgosh@iitm.ac.in](mailto:sgosh@iitm.ac.in)*

## Table of contents

### I.1 Supplementary Data

- Figure S1 Molecular structure and labelling diagram of **3**
- Figure S2 Molecular structure and labelling diagram of **4**
- Figure S3 Schematic generation of the cluster framework of **2** from tricapped trigonal prism
- Figure S4 Diamond-Square-Diamond (DSD) rearrangement of parent *closo*-cluster to form corresponding hypoelectronic cluster **4**

### I.2 Spectroscopic Details

- Figure S5 ESI-MS spectrum of **1** in CH<sub>2</sub>Cl<sub>2</sub>
- Figure S6 <sup>1</sup>H NMR spectrum of **1** in CDCl<sub>3</sub>
- Figure S7 <sup>1</sup>H{<sup>11</sup>B} NMR spectrum of **1** in CDCl<sub>3</sub>
- Figure S8 Stacked <sup>1</sup>H and <sup>1</sup>H{<sup>11</sup>B} NMR spectra of **1** in CDCl<sub>3</sub>
- Figure S9 <sup>11</sup>B{<sup>1</sup>H} NMR spectrum of **1** in CDCl<sub>3</sub>
- Figure S10 Stacked <sup>11</sup>B{<sup>1</sup>H} and <sup>11</sup>B NMR spectra of **1** in CDCl<sub>3</sub>
- Figure S11 <sup>13</sup>C{<sup>1</sup>H} NMR spectrum of **1** in CDCl<sub>3</sub>
- Figure S12 IR spectrum of **1** in CH<sub>2</sub>Cl<sub>2</sub>
- Figure S13 ESI-MS spectrum of **2** in CH<sub>2</sub>Cl<sub>2</sub>
- Figure S14 <sup>1</sup>H NMR spectrum of **2** in CDCl<sub>3</sub>
- Figure S15 <sup>1</sup>H{<sup>11</sup>B} NMR spectrum of **2** in CDCl<sub>3</sub>
- Figure S16 Stacked <sup>1</sup>H and <sup>1</sup>H{<sup>11</sup>B} NMR spectra of **2** in CDCl<sub>3</sub>
- Figure S17 <sup>11</sup>B{<sup>1</sup>H} NMR spectrum of **2** in CDCl<sub>3</sub>
- Figure S18 Stacked <sup>11</sup>B{<sup>1</sup>H} and <sup>11</sup>B NMR spectra of **2** in CDCl<sub>3</sub>
- Figure S19 <sup>13</sup>C{<sup>1</sup>H} NMR spectrum of **2** in CDCl<sub>3</sub>
- Figure S20 <sup>1</sup>H-<sup>11</sup>B{<sup>1</sup>H} HSQC NMR spectrum of **2** in CDCl<sub>3</sub>
- Figure S21 The variable temperature stacked <sup>1</sup>H NMR spectra of **2** in *d*<sub>8</sub>-toluene
- Figure S22 The variable temperature stacked <sup>11</sup>B{<sup>1</sup>H} NMR spectra of **2** in *d*<sub>8</sub>-toluene
- Figure S23 IR spectrum of **2** in CH<sub>2</sub>Cl<sub>2</sub>
- Figure S24 ESI-MS spectrum of **3** in CH<sub>2</sub>Cl<sub>2</sub>
- Figure S25 <sup>1</sup>H NMR spectrum of **3** in CDCl<sub>3</sub>
- Figure S26 <sup>11</sup>B{<sup>1</sup>H} NMR spectrum of **3** in CDCl<sub>3</sub>

- Figure S27 Stacked  $^{11}\text{B}\{^1\text{H}\}$  and  $^{11}\text{B}$  NMR spectra of **3** in  $\text{CDCl}_3$
- Figure S28  $^{13}\text{C}\{^1\text{H}\}$  NMR spectrum of **3** in  $\text{CDCl}_3$
- Figure S29 IR spectrum of **3** in  $\text{CH}_2\text{Cl}_2$
- Figure S30 ESI-MS spectrum of **4** in  $\text{CH}_2\text{Cl}_2$
- Figure S31  $^1\text{H}$  NMR spectrum of **4** in  $\text{CDCl}_3$
- Figure S32  $^1\text{H}\{^{11}\text{B}\}$  NMR spectrum of **4** in  $\text{CDCl}_3$
- Figure S33 Stacked  $^1\text{H}$  and  $^1\text{H}\{^{11}\text{B}\}$  NMR spectra of **4** in  $\text{CDCl}_3$
- Figure S34  $^{11}\text{B}\{^1\text{H}\}$  NMR spectrum of **4** in  $\text{CDCl}_3$
- Figure S35 Stacked  $^{11}\text{B}\{^1\text{H}\}$  and  $^{11}\text{B}$  NMR spectra of **4** in  $\text{CDCl}_3$
- Figure S36  $^{13}\text{C}\{^1\text{H}\}$  NMR spectrum of **4** in  $\text{CDCl}_3$
- Figure S37 IR spectrum of **4** in  $\text{CH}_2\text{Cl}_2$

## II Computational Data

- Table S1 Selected geometrical parameters and Wiberg indices (WBIs) of **1'**-**4'**
- Table S2. Calculated  $^{11}\text{B}$  chemical shifts for **1'**-**4'**
- Figure S38 Selected molecular orbitals of **1**
- Figure S39 Selected localized orbitals of **1** computed using IBOview
- Figure S40 Frontier molecular orbitals and their respective energy levels for **VII-IX**
- Figure S41 Frontier molecular orbitals of  $[(\text{Cp}^*\text{Os})_2\text{B}_7\text{H}_7]$ ,  $[(\text{Cp}^*\text{Os})_2\text{B}_6\text{H}_6]$ , **3**, and **4**
- Figure S42 Selected localized orbitals of **3** computed using IBOview
- Figure S43 Selected localized orbitals of **4** computed using IBOview
- Figure S44 Optimized geometry of **1'**
- Figure S45 Optimized geometry of **2'**
- Figure S46 Optimized geometry of **3'**
- Figure S47 Optimized geometry of **4'**

## I.1 Supplementary Data

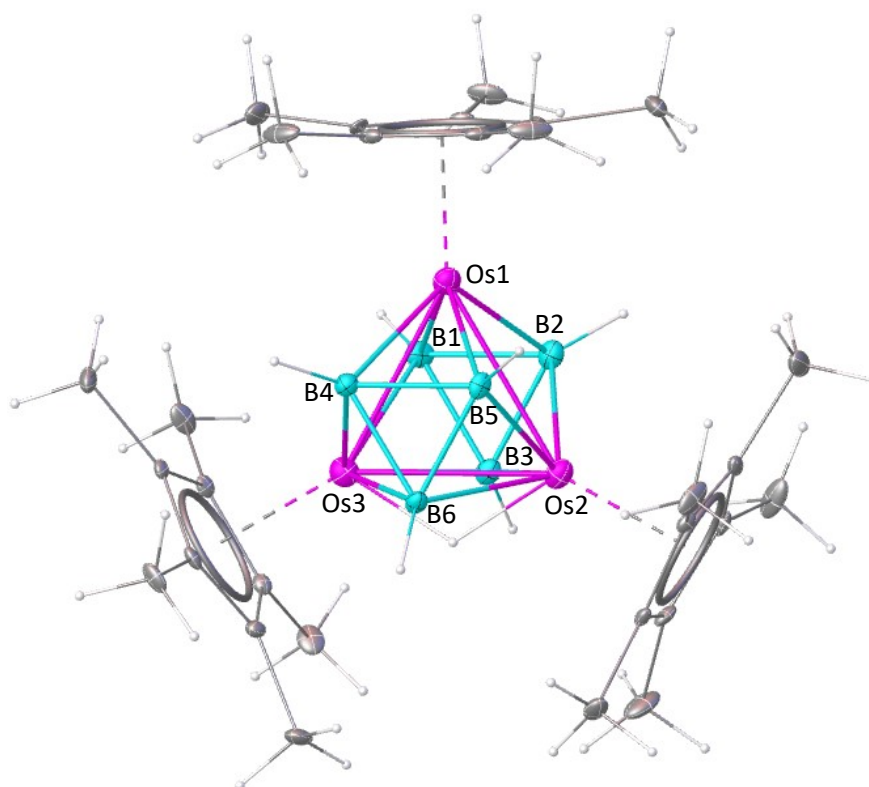

**Figure S1.** Molecular structure and labelling diagram of **3**. Selected bond lengths (Å): B1 B2 1.694(16), B1 B3 1.698(16), B1 Os1 2.173(11), B1 Os3 2.174(12), B2 B3 1.706(17), B2 Os1 2.186(11), B2 Os2 2.192(12), B3 Os3 2.188(10), B3 Os2 2.190(11), B4 B6 1.707(14), B4 B5 1.730(15), B4 Os3 2.174(11), B4 Os1 2.184(11), B5 B6 1.707(16), B5 Os2 2.188(10), B5 Os1 2.200(10), B6 Os2 2.174(10), B6 Os3 2.188(10), Os1 Os3 2.7782(5), Os1 Os2 2.7841(5), Os2 Os3 2.7786(5).

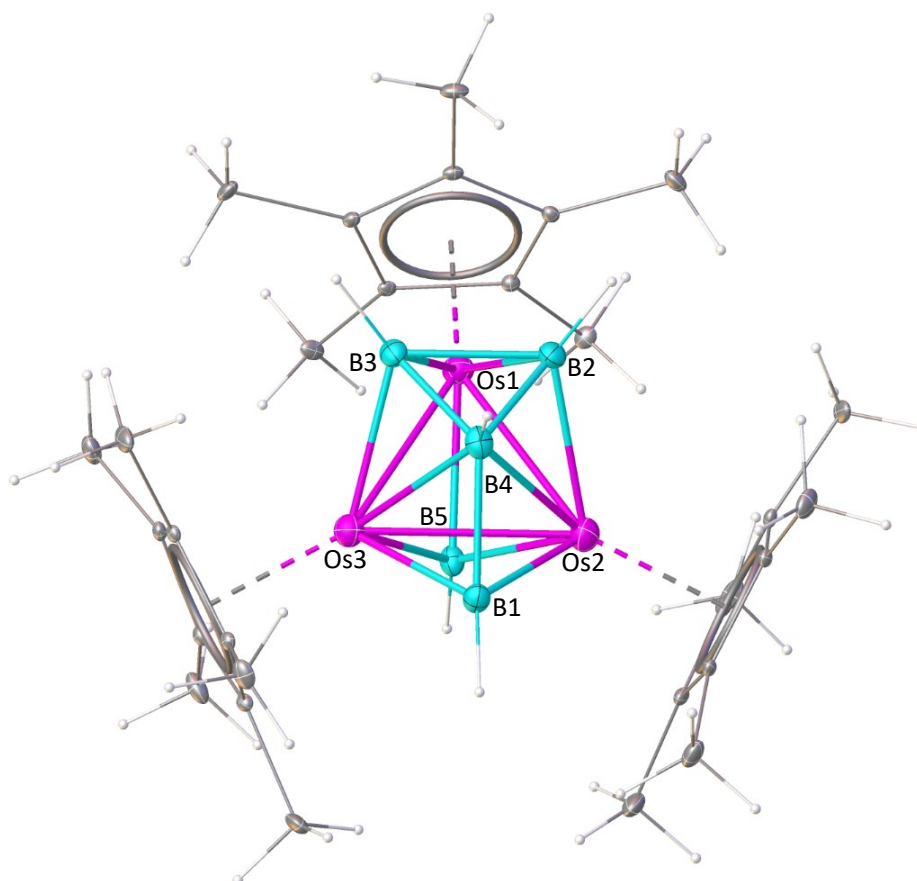

**Figure S2.** Molecular structure and labelling diagram of **4**. Selected bond lengths (Å): Os1 Os2 2.7893(11), Os1 Os3 2.8017(10), Os2 Os3 2.721, B1 B4 1.793(9), B1 Os2 2.041(6), B1 Os3 2.045(6), B2 B4 1.714(9), B2 B3 1.832(9), B2 Os2 2.146(6), B3 B4 1.711(9), B3 Os3 2.134(6), B4 Os3 2.232(6), B4 Os2 2.243(6), B5 Os3 2.119(5), B5 Os2 2.139(5).

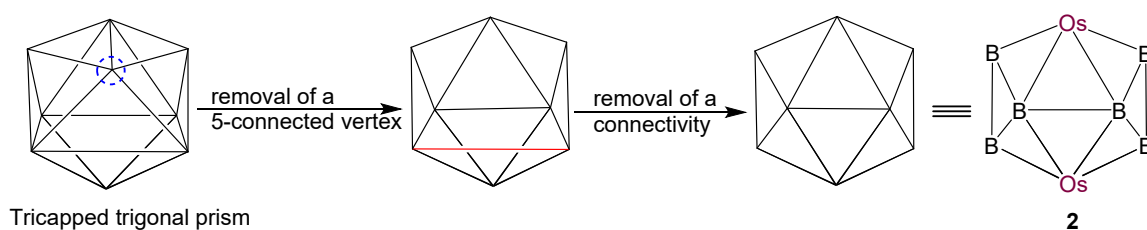

**Figure S3.** Schematic generation of the cluster framework of **2** from tricapped trigonal prism.

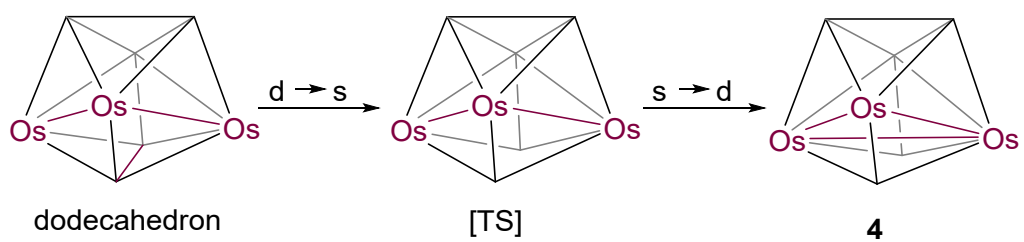

**Figure S4.** Diamond-Square-Diamond (DSD) rearrangement of the parent *closo*-cluster to form the corresponding hypoelectronic cluster **4**.

## I.2 Spectroscopic details

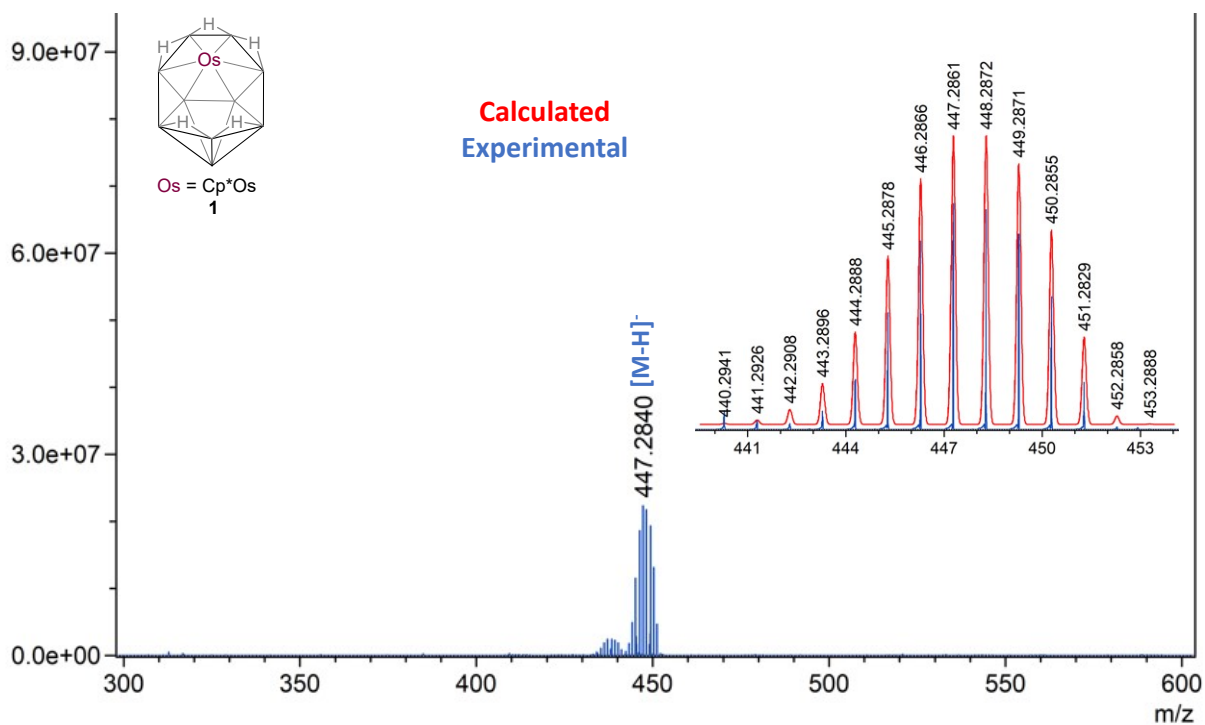

Figure S5. ESI-MS spectrum of **1** in  $\text{CH}_2\text{Cl}_2$ .

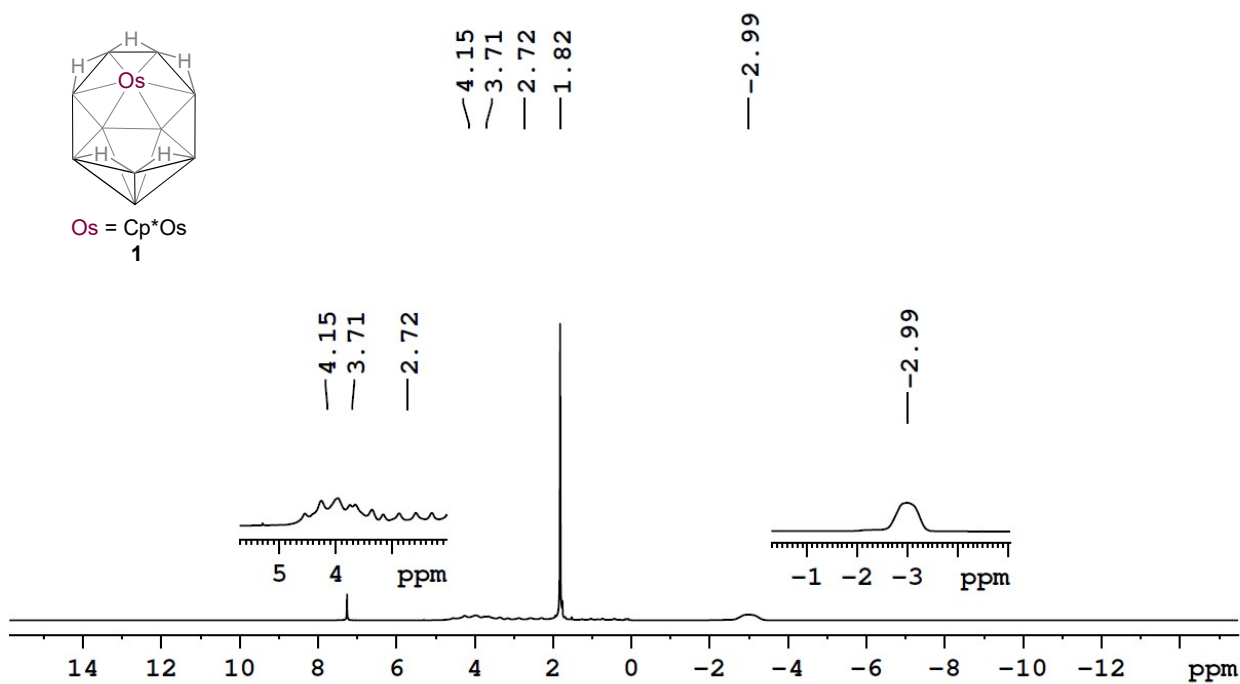

Figure S6.  $^1\text{H}$  NMR spectrum of **1** in  $\text{CDCl}_3$ .

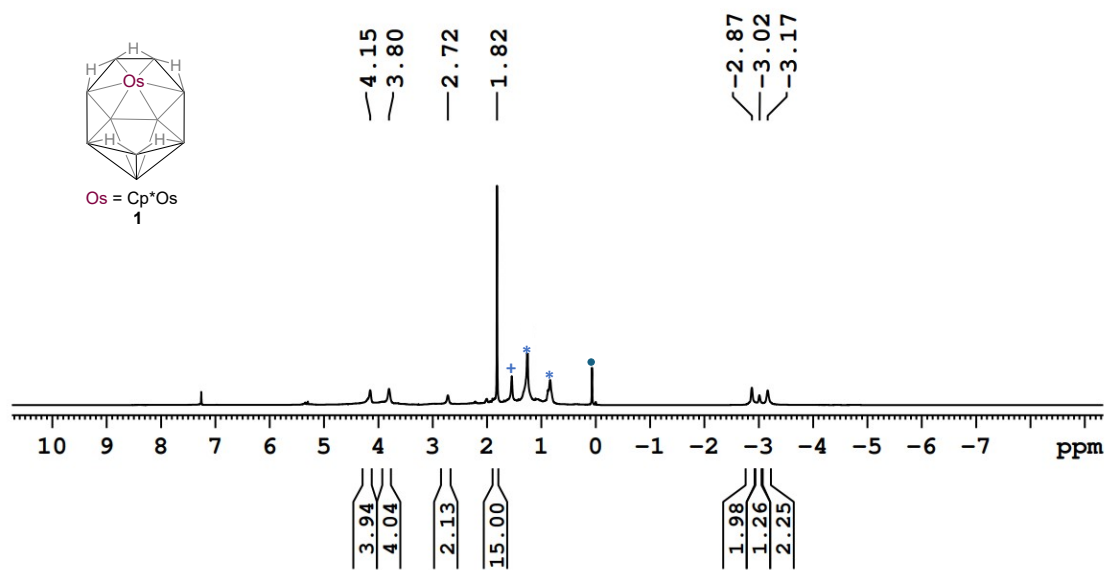

**Figure S7.**  $^1\text{H}\{^{11}\text{B}\}$  NMR spectrum of **1** in  $\text{CDCl}_3$  (\*hexane, •silicon-grease, + $\text{H}_2\text{O}$ ).

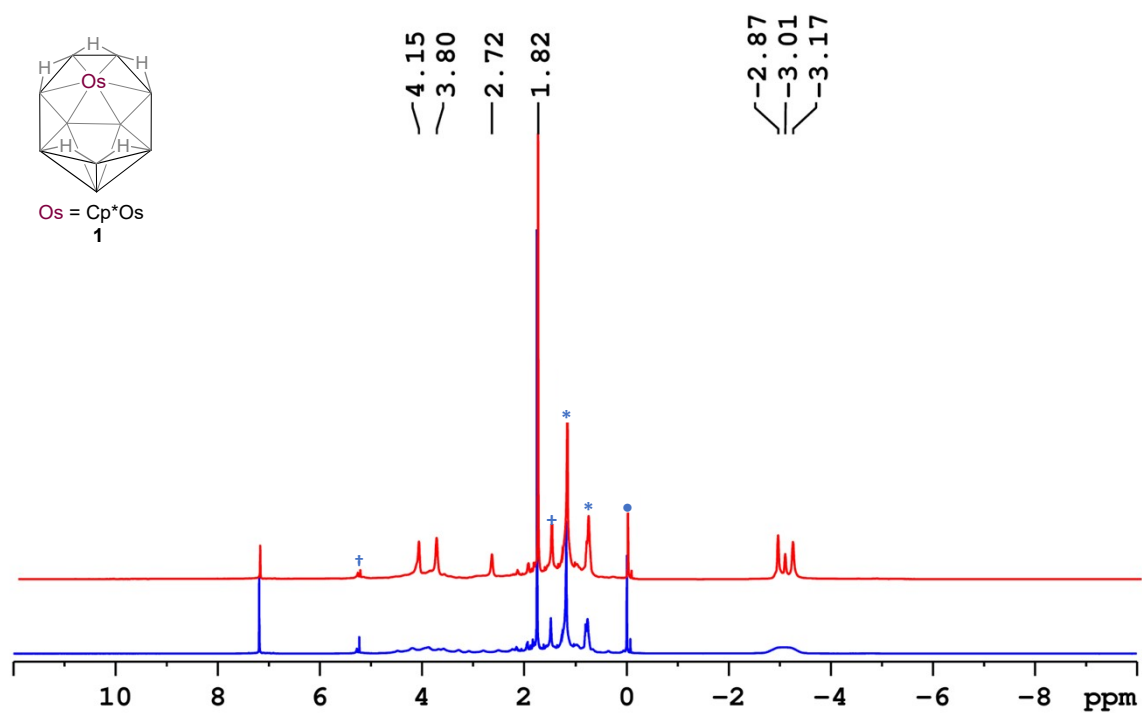

**Figure S8.** Stacked  $^1\text{H}$  (bottom) and  $^1\text{H}\{^{11}\text{B}\}$  NMR (top) spectra of **1** in  $\text{CDCl}_3$  (+ $\text{CH}_2\text{Cl}_2$ , \*hexane, •silicon-grease, + $\text{H}_2\text{O}$ ).

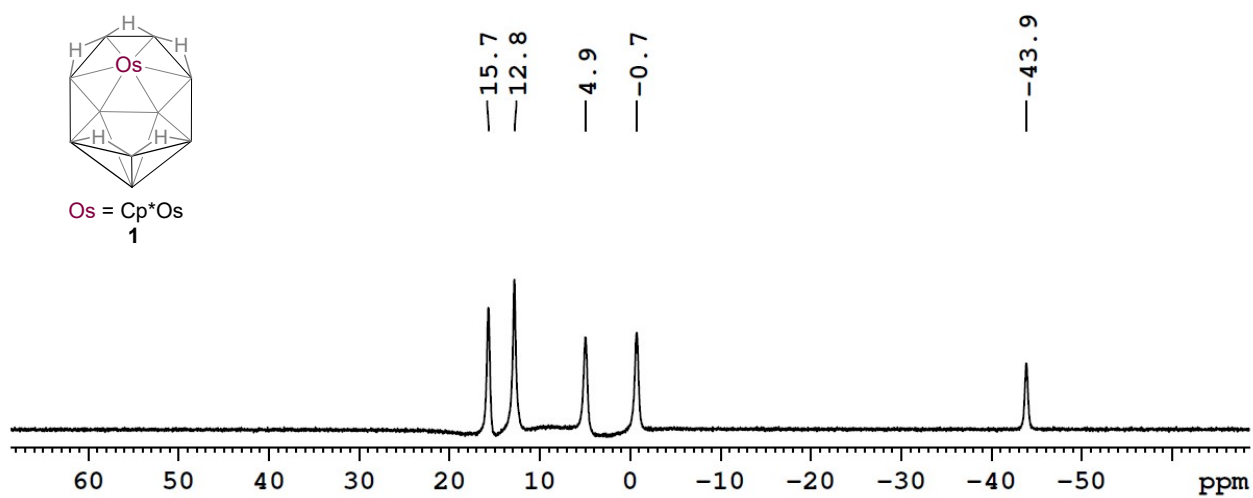

Figure S9.  $^{11}\text{B}\{^1\text{H}\}$  NMR spectrum of **1** in  $\text{CDCl}_3$ .

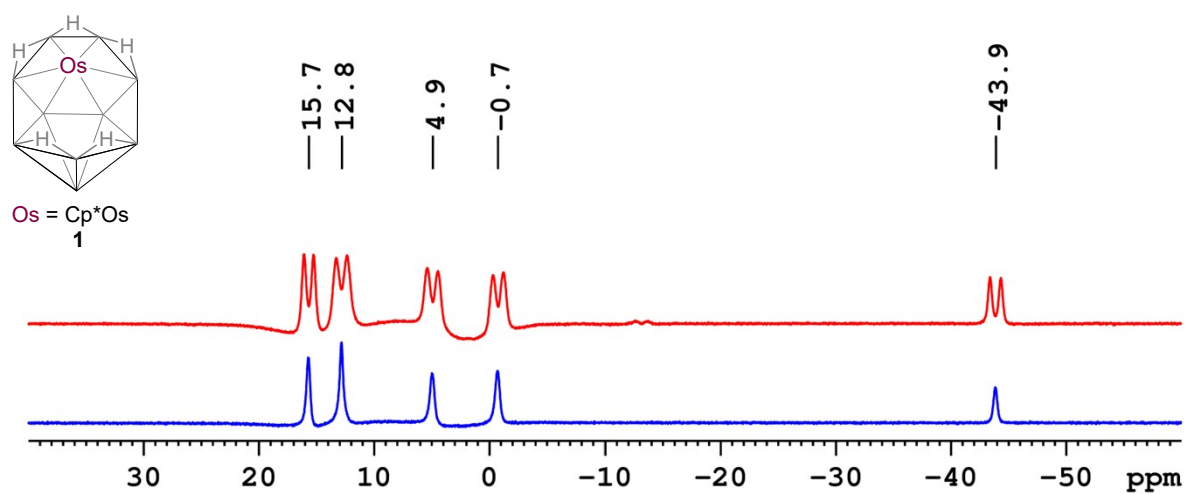

Figure S10. Stacked  $^{11}\text{B}\{^1\text{H}\}$  (bottom) and  $^{11}\text{B}$  NMR (top) spectra of **1** in  $\text{CDCl}_3$ .

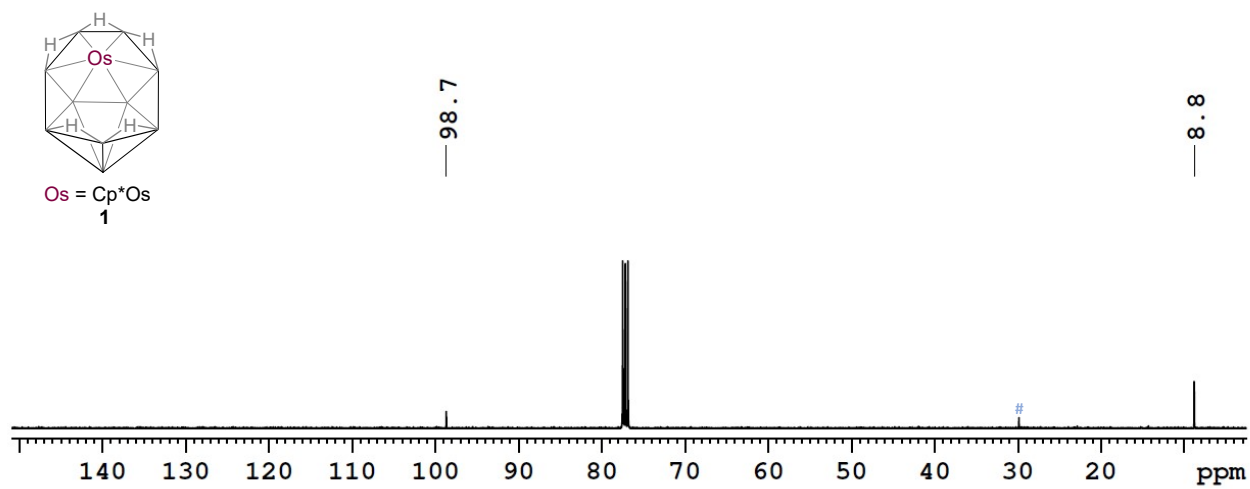

**Figure S11.**  $^{13}\text{C}\{^1\text{H}\}$  NMR spectrum of **1** in  $\text{CDCl}_3$  (#H-grease).

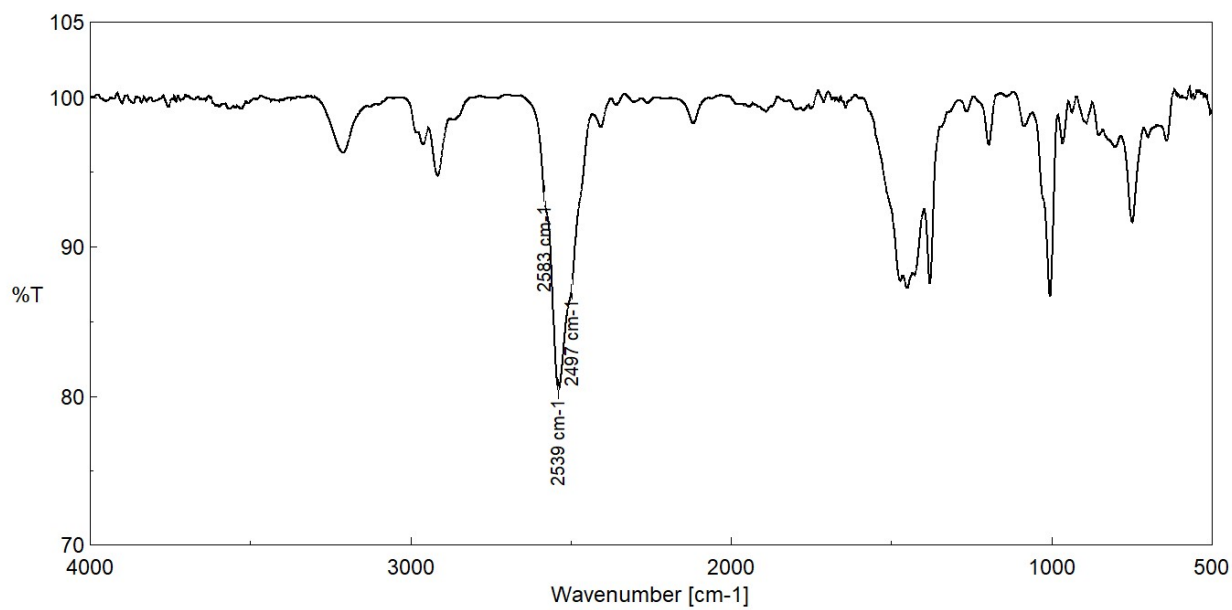

**Figure S12.** IR spectrum of **1** in  $\text{CH}_2\text{Cl}_2$ .

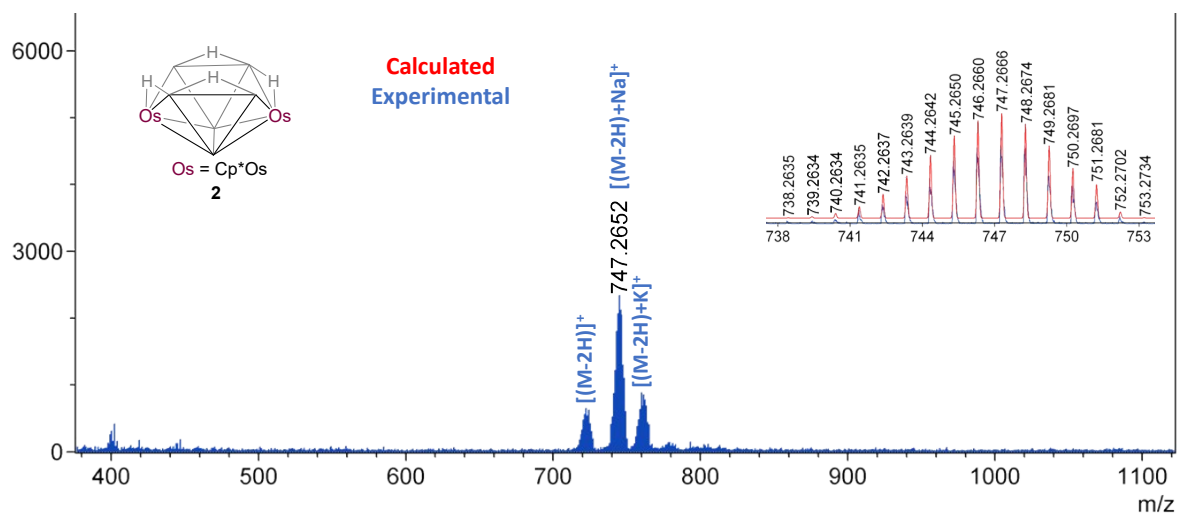

Figure S13. ESI-MS spectrum of **2** in  $\text{CH}_2\text{Cl}_2$ .

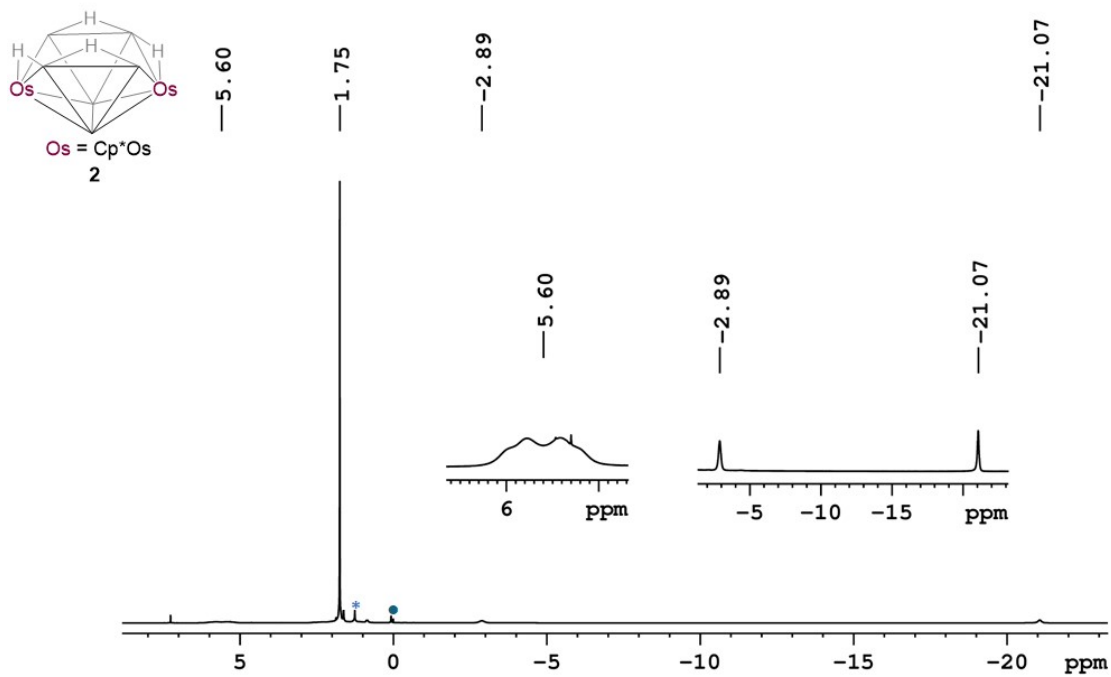

Figure S14.  $^1\text{H}$  NMR spectrum of **2** in  $\text{CDCl}_3$  (●silicone grease, \*hexane).

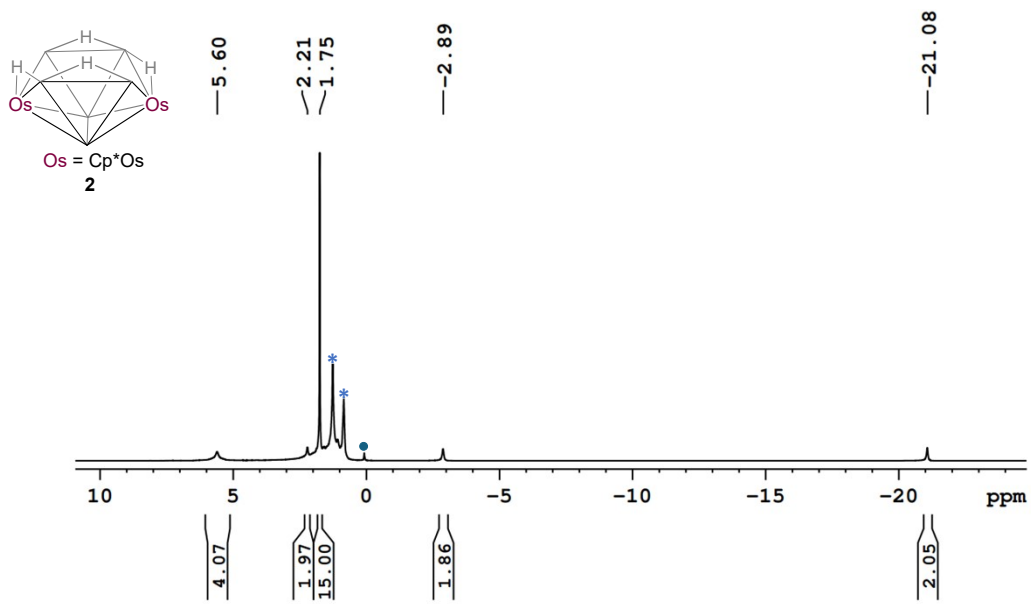

**Figure S15.**  $^1\text{H}\{^{11}\text{B}\}$  NMR spectrum of **2** in  $\text{CDCl}_3$  (●silicone grease, \*hexane).

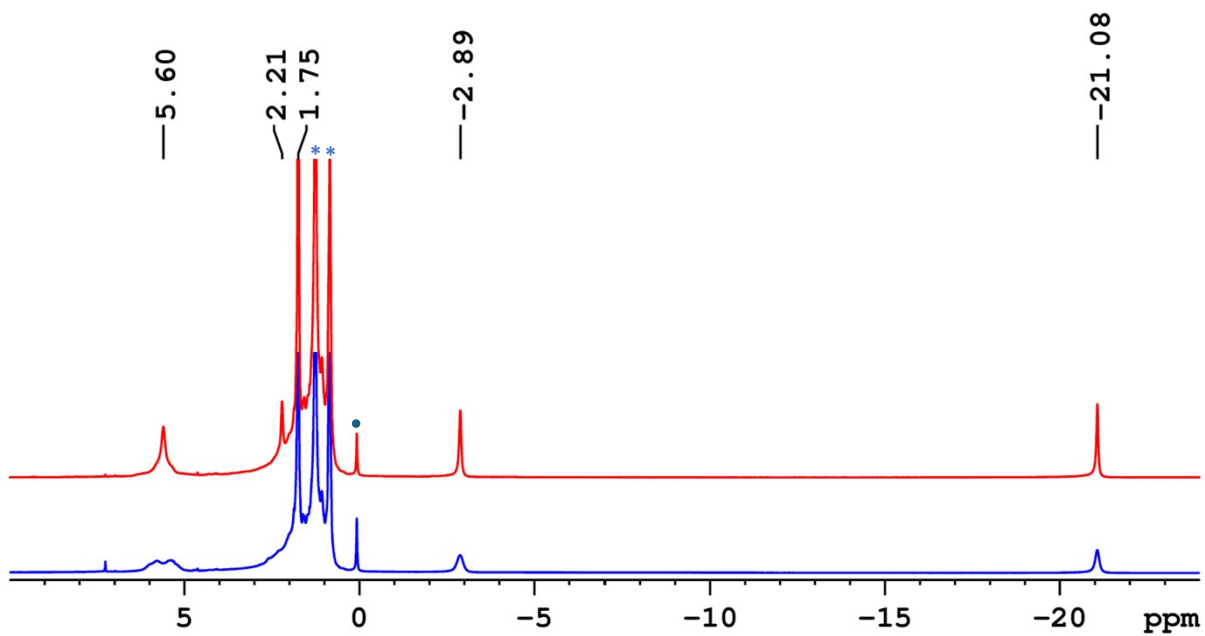

**Figure S16.** Stacked  $^1\text{H}$  (bottom) and  $^1\text{H}\{^{11}\text{B}\}$  NMR (top) spectra of **2** in  $\text{CDCl}_3$  (●silicone grease, \*hexane).

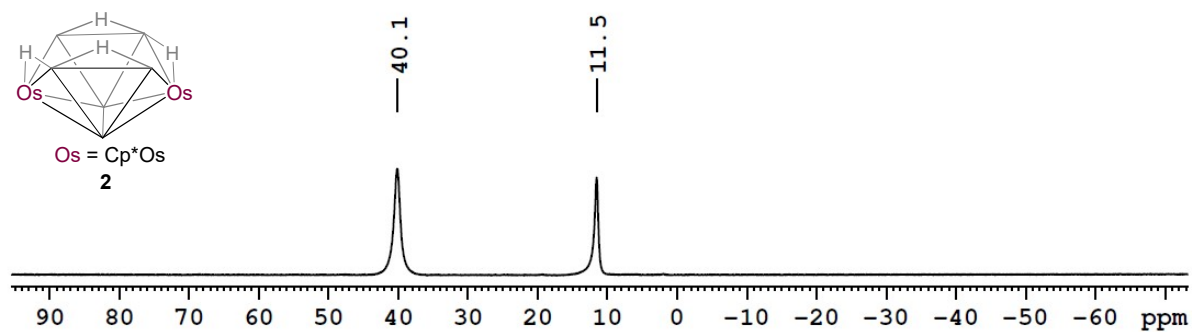

Figure S17.  $^{11}\text{B}\{^1\text{H}\}$  NMR spectrum of **2** in  $\text{CDCl}_3$ .

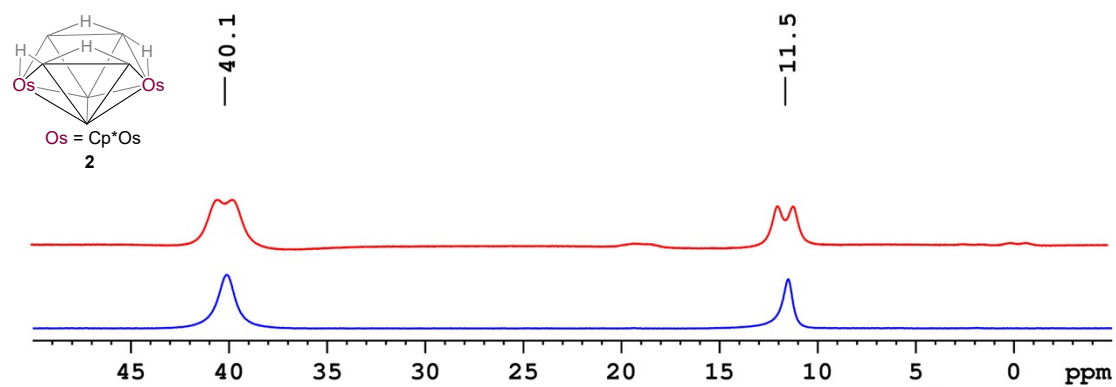

Figure S18. Stacked  $^{11}\text{B}\{^1\text{H}\}$  (bottom) and  $^{11}\text{B}$  NMR (top) spectra of **2** in  $\text{CDCl}_3$ .

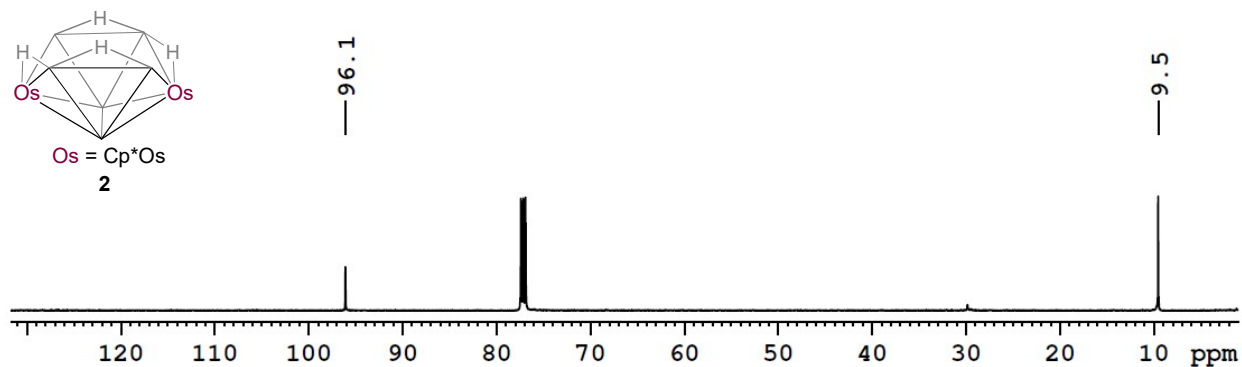

Figure S19.  $^{13}\text{C}\{^1\text{H}\}$  NMR spectrum of **2** in  $\text{CDCl}_3$ .

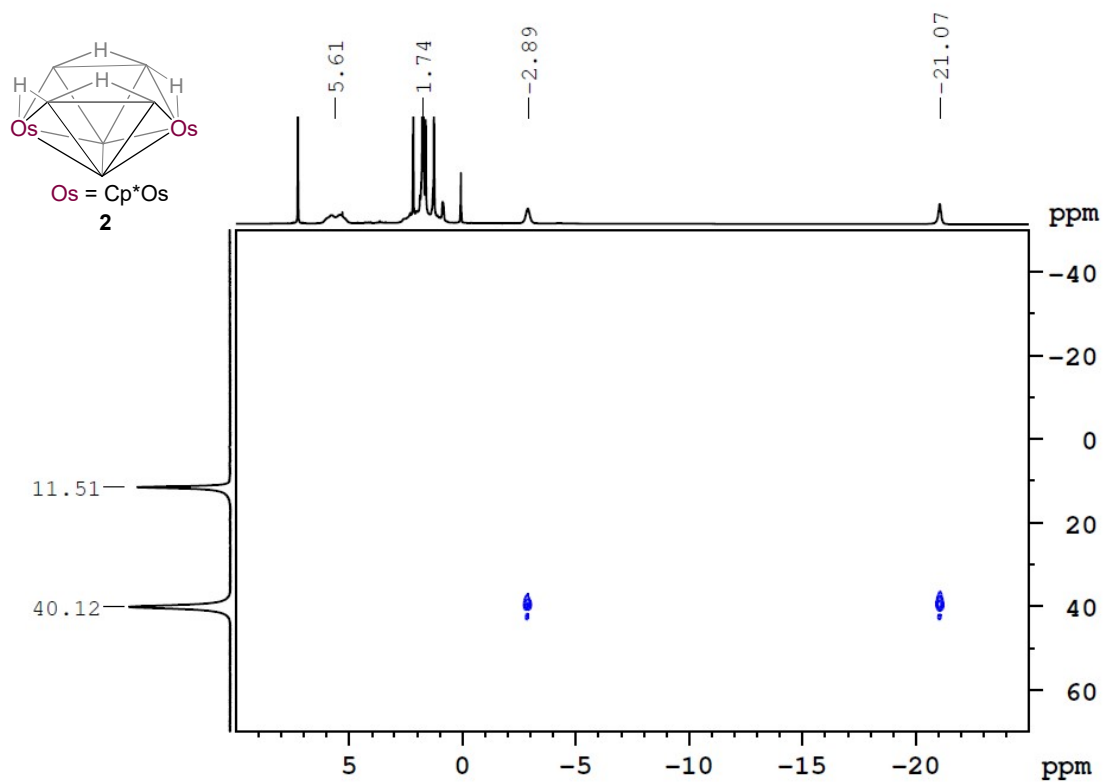

**Figure S20.**  $^1\text{H}$ - $^{11}\text{B}$  HSQC NMR spectrum of **2** in  $\text{CDCl}_3$ .

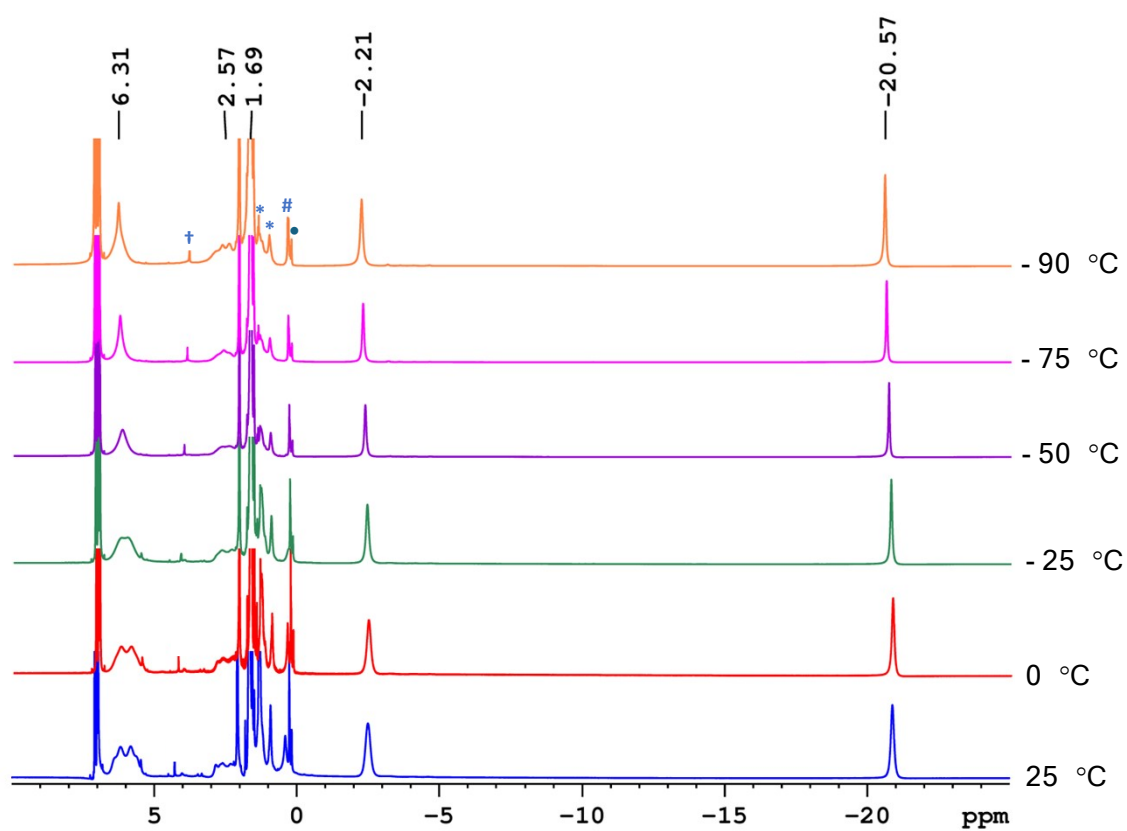

**Figure S21.** The variable temperature stacked  $^1\text{H}$  NMR spectra of **2** in  $d_8$ -toluene ( $\dagger\text{CH}_2\text{Cl}_2$ ,  $\bullet$ silicone grease,  $\#$ H-grease,  $*$ hexane).

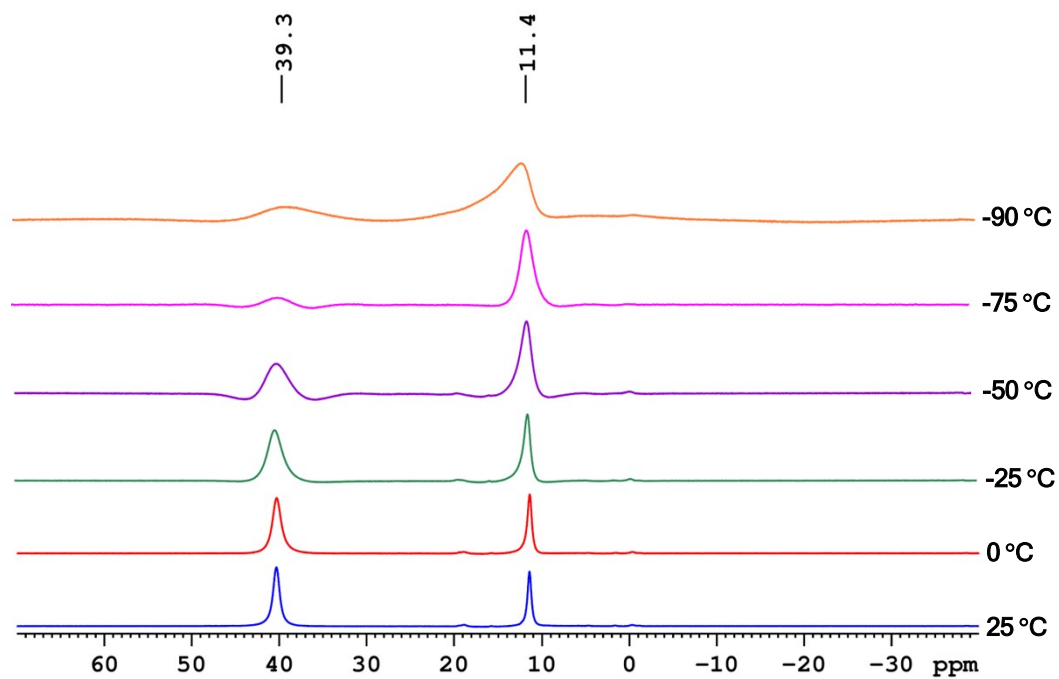

**Figure S22.** The variable temperature stacked  $^{11}\text{B}\{^1\text{H}\}$  NMR spectra of **2** in  $d_8$ -toluene.

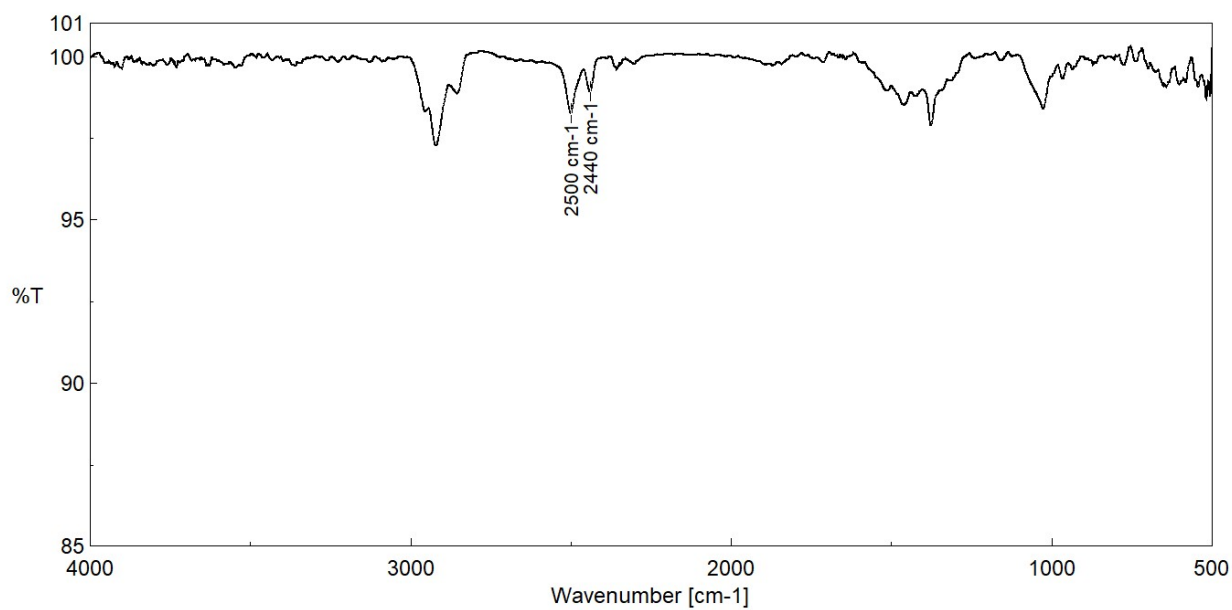

**Figure S23.** IR spectrum of **2** in  $\text{CH}_2\text{Cl}_2$ .

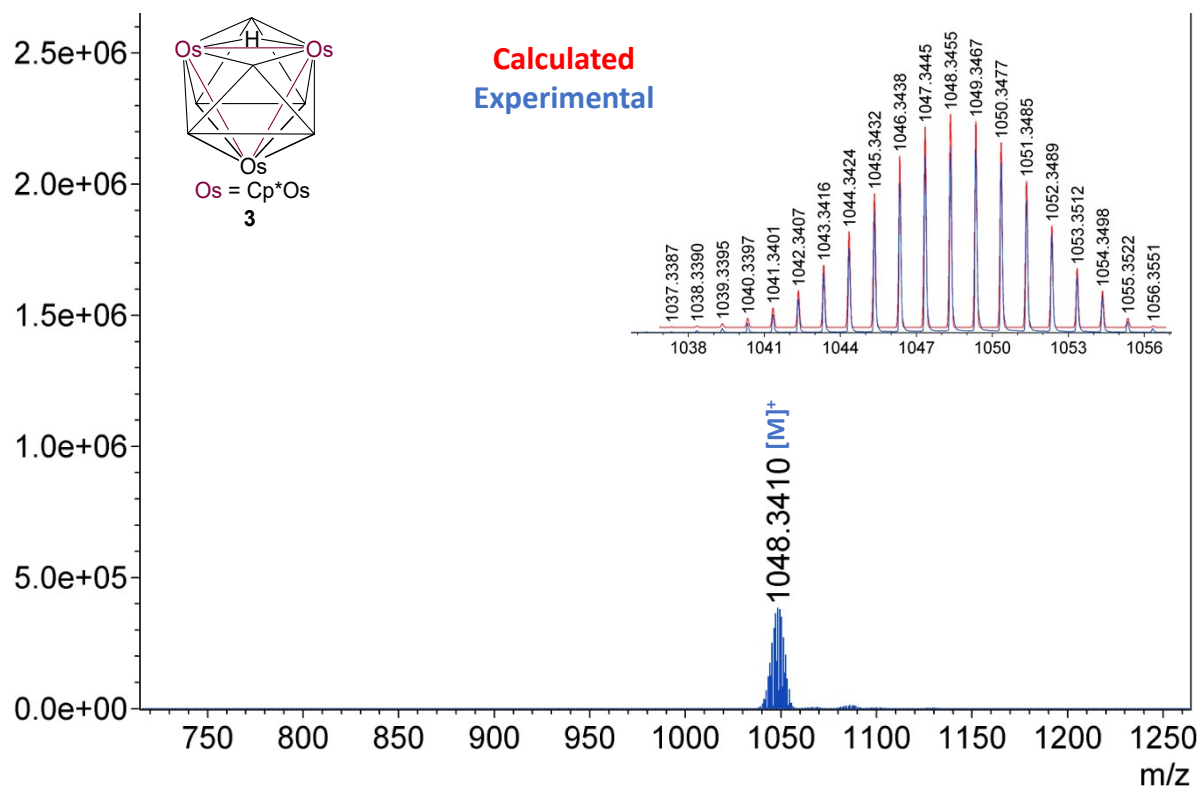

Figure S24. ESI-MS spectrum of **3** in  $\text{CH}_2\text{Cl}_2$ .

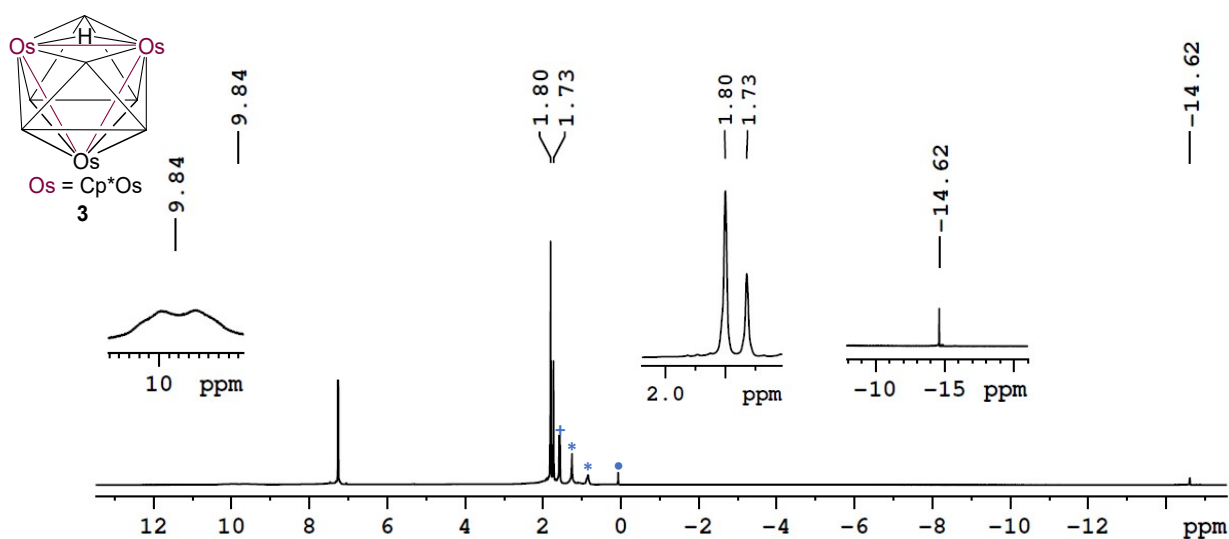

Figure S25.  $^1\text{H}$  NMR spectrum of **3** in  $\text{CDCl}_3$  (●silicone grease, \*hexane, + $\text{H}_2\text{O}$ ).

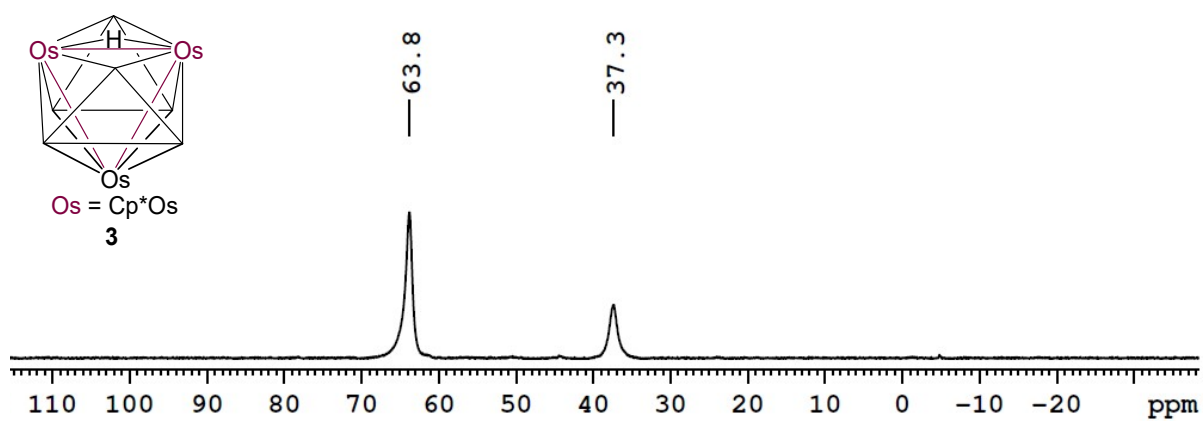

**Figure S26.**  $^{11}\text{B}\{^1\text{H}\}$  NMR spectrum of **3** in  $\text{CDCl}_3$ .

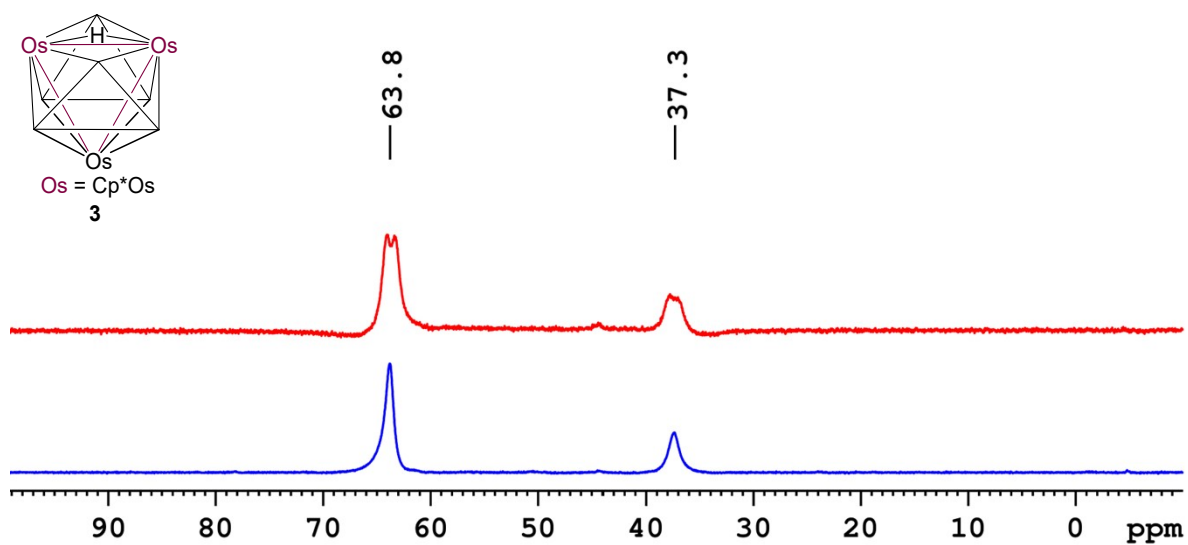

**Figure S27.** Stacked  $^{11}\text{B}\{^1\text{H}\}$  (bottom) and  $^{11}\text{B}$  NMR (top) spectra of **3** in  $\text{CDCl}_3$ .

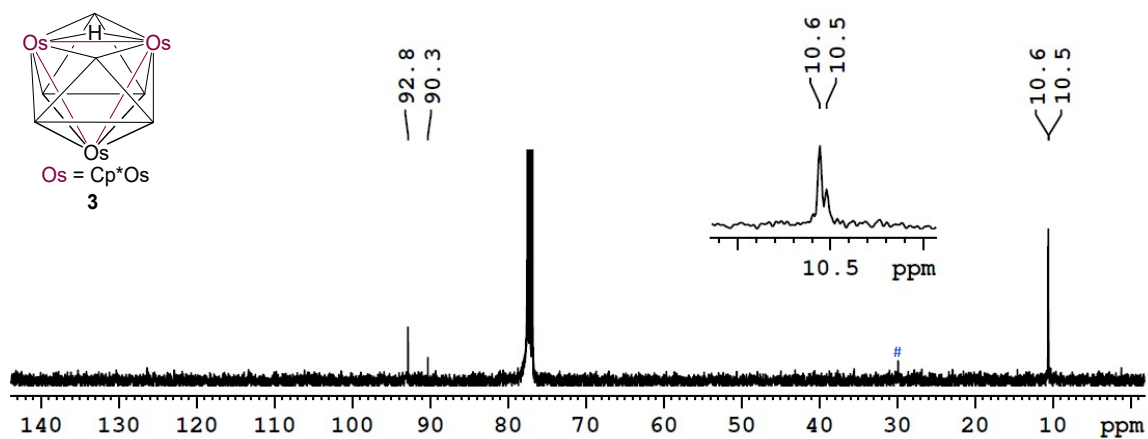

**Figure S28.**  $^{13}\text{C}\{^1\text{H}\}$  NMR spectrum of **3** in  $\text{CDCl}_3$  (#H-grease).

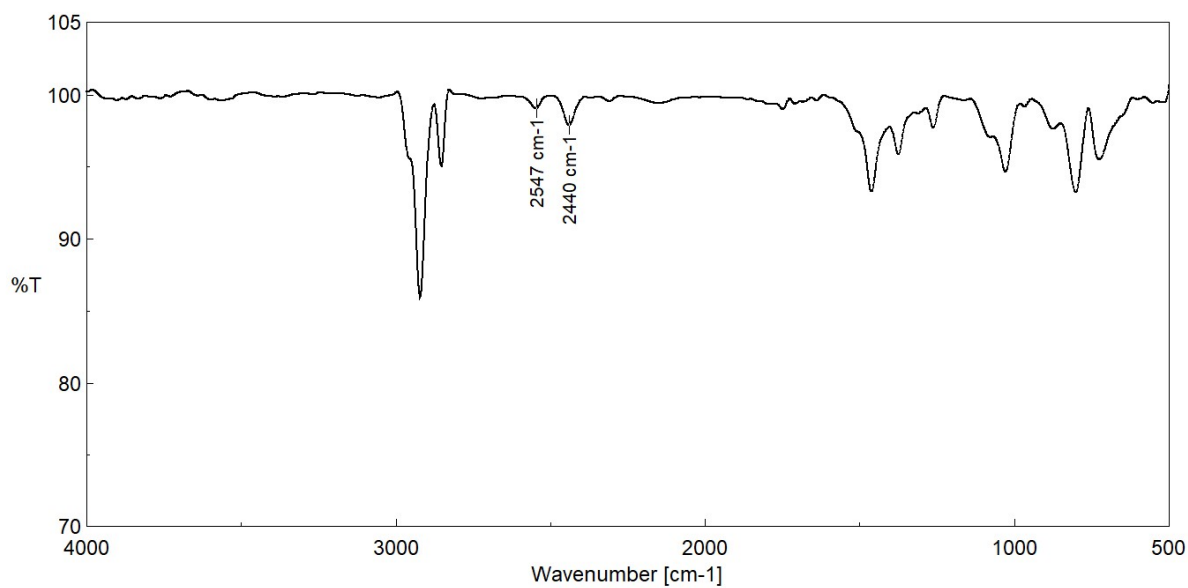

**Figure S29.** IR spectrum of **3** in  $\text{CH}_2\text{Cl}_2$ .

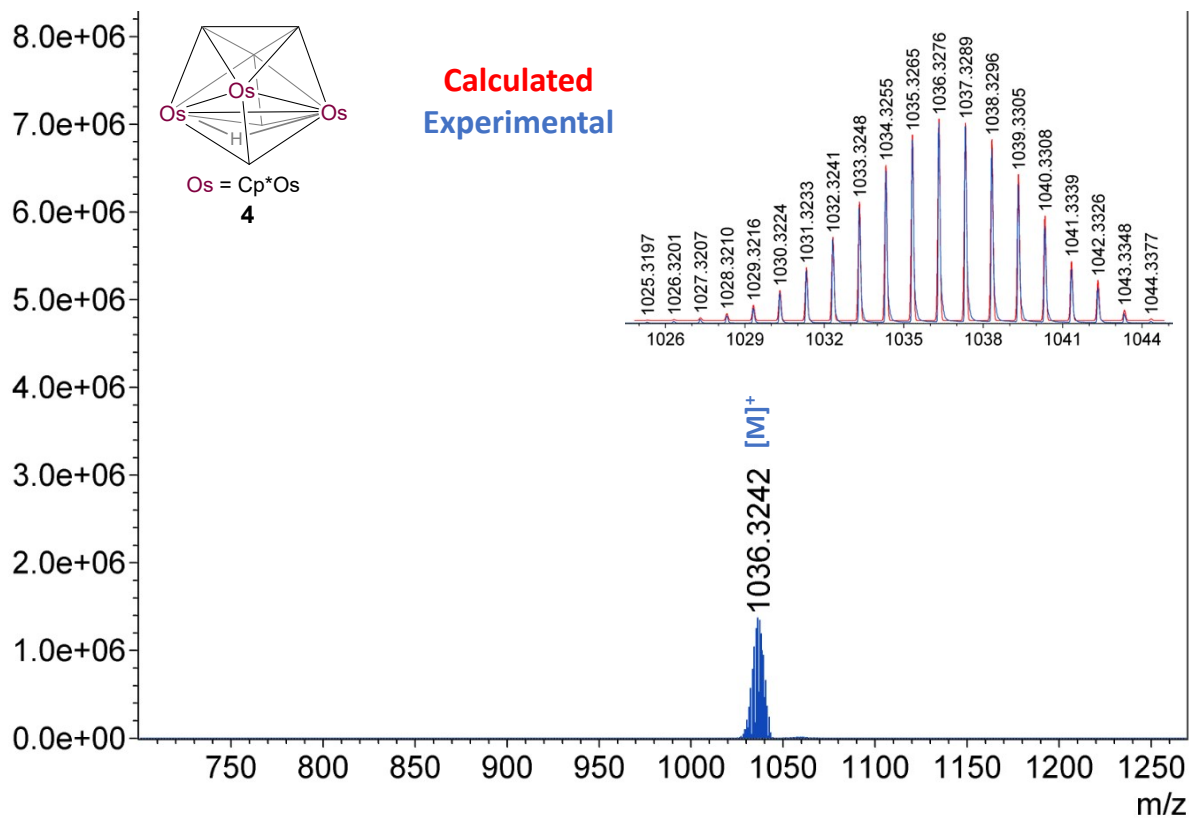

Figure S30. ESI-MS spectrum of **4** in CH<sub>2</sub>Cl<sub>2</sub>.

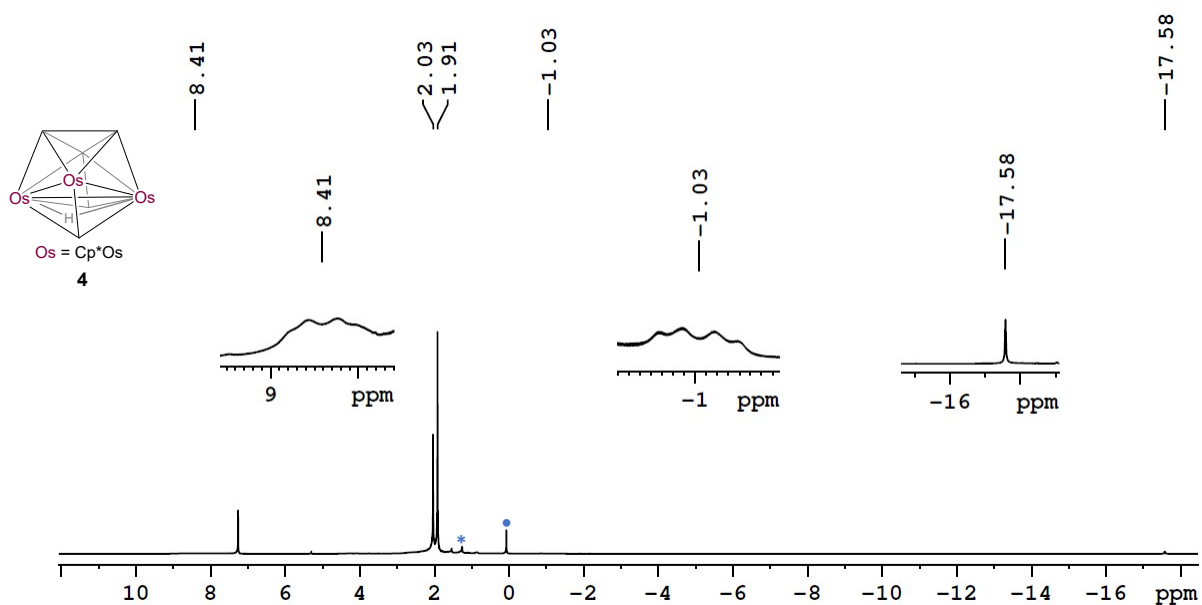

Figure S31. <sup>1</sup>H NMR spectrum of **4** in CDCl<sub>3</sub> (●silicone grease, \* hexane).

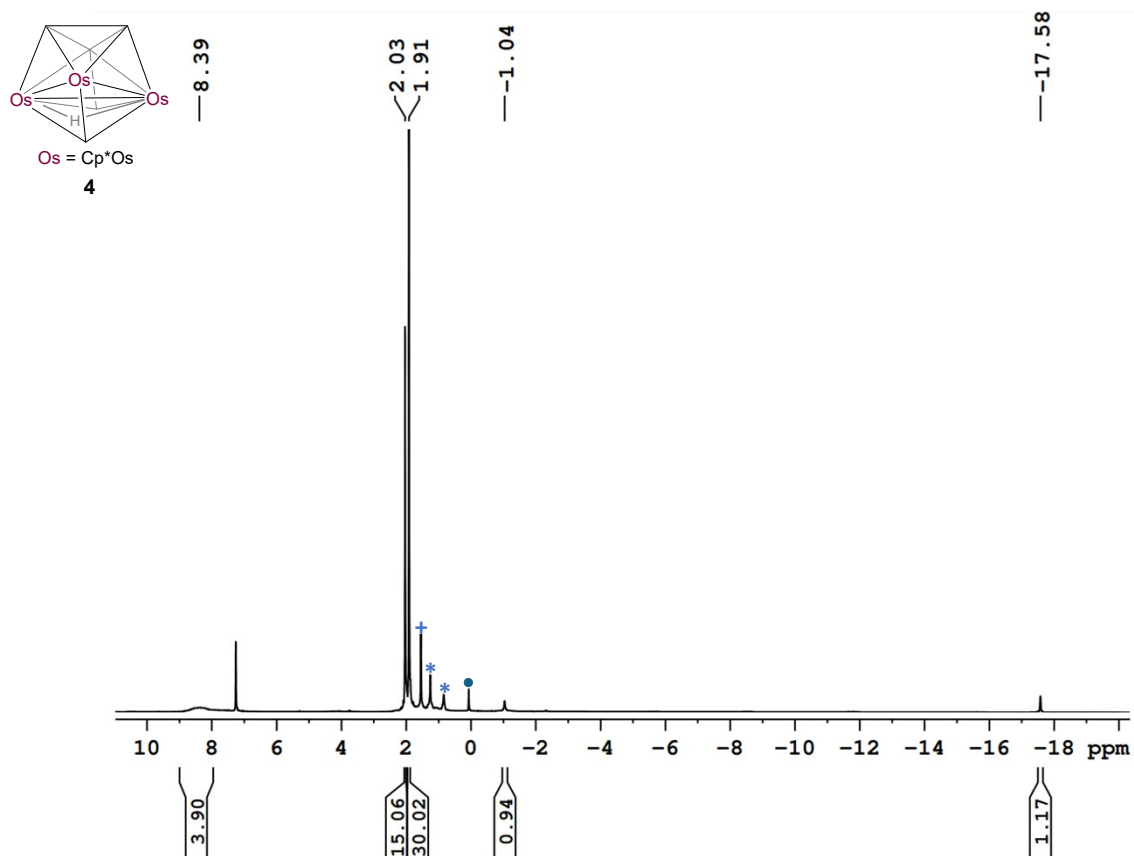

**Figure S32.**  $^1\text{H}\{^{11}\text{B}\}$  NMR spectrum of **4** in  $\text{CDCl}_3$  (●silicone grease, \*hexane, + $\text{H}_2\text{O}$ ).

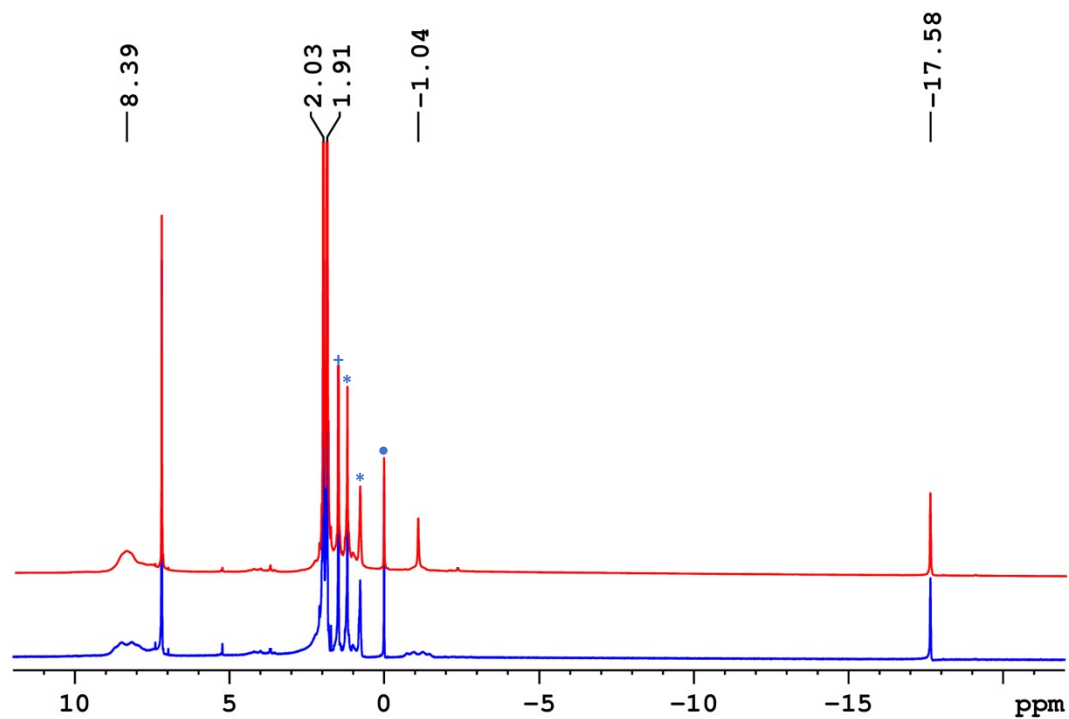

**Figure S33.** Stacked  $^1\text{H}$  (bottom) and  $^1\text{H}\{^{11}\text{B}\}$  NMR (top) spectra of **4** in  $\text{CDCl}_3$  (●silicone grease, \*hexane, + $\text{H}_2\text{O}$ ).

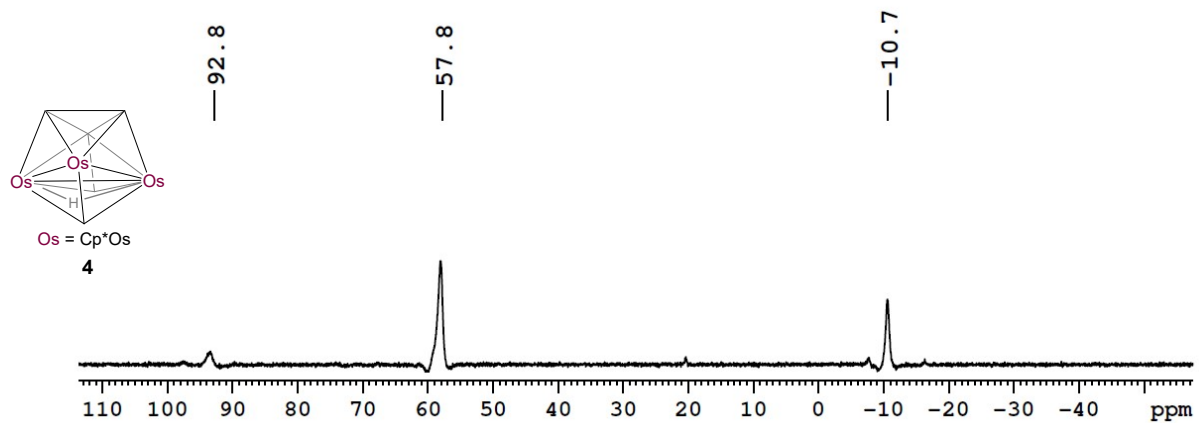

Figure S34.  $^{11}\text{B}\{^1\text{H}\}$  NMR spectrum of **4** in  $\text{CDCl}_3$ .

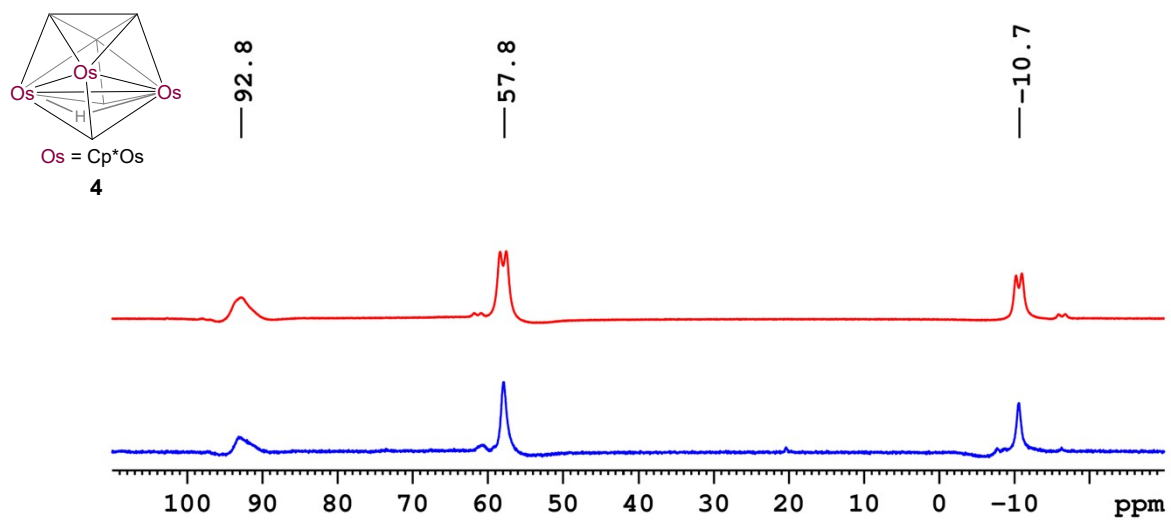

Figure S35. Stacked  $^{11}\text{B}\{^1\text{H}\}$  (bottom) and  $^{11}\text{B}$  NMR (top) spectra of **4** in  $\text{CDCl}_3$ .

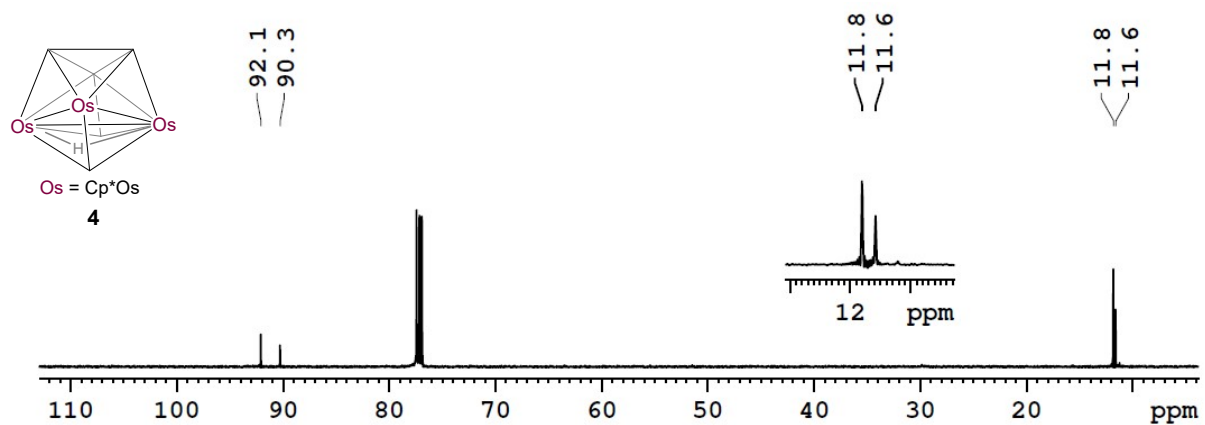

Figure S36.  $^{13}\text{C}\{^1\text{H}\}$  NMR spectrum of **4** in  $\text{CDCl}_3$ .

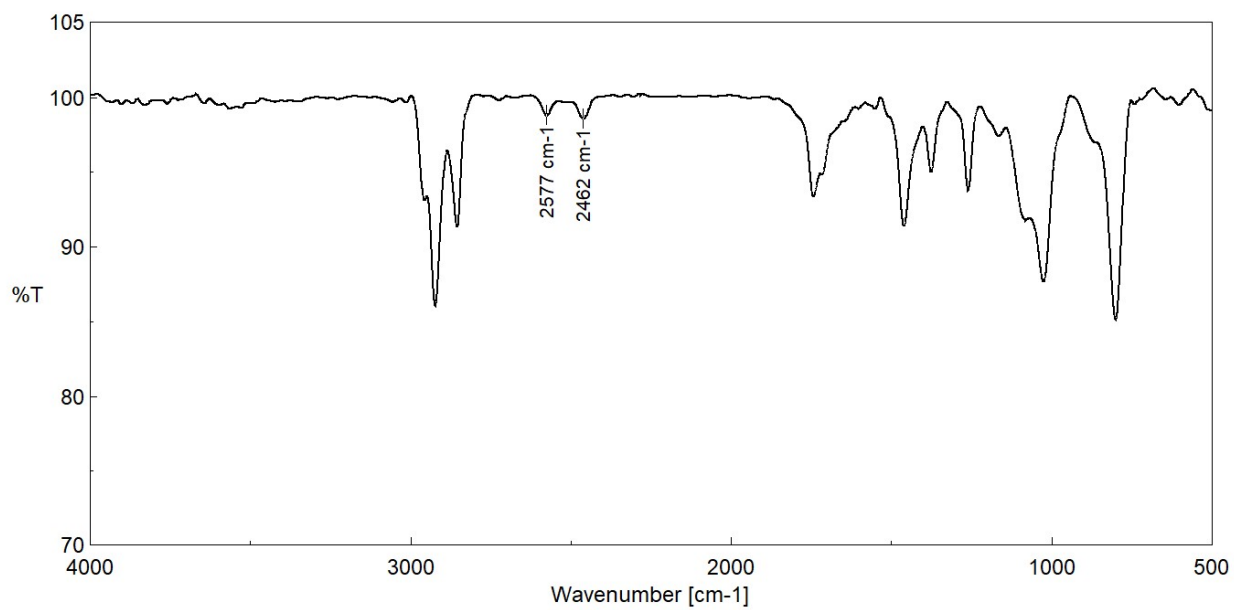

Figure S37. IR spectrum of **4** in  $\text{CH}_2\text{Cl}_2$ .

## II Computational Data

**Table S1.** Selected geometrical parameters and Wiberg indices (WBIs) of 1'-4'.

| 1/1'    |       |       |       | 2/2'    |       |       |       |
|---------|-------|-------|-------|---------|-------|-------|-------|
|         | Expt. | Cal.  | WBI   |         | Expt. | Cal.  | WBI   |
| Os1-B1  | 2.130 | 2.148 | 0.511 | Os1-B2  | 2.304 | 2.246 | 0.430 |
| Os1-B24 | 2.114 | 2.148 | 0.511 | Os2-B2  | 2.308 | 2.252 | 0.428 |
| Os1-B3  | 2.210 | 2.239 | 0.446 | Os1-B3  | 2.302 | 2.318 | 0.357 |
| Os1-B4  | 2.218 | 2.250 | 0.404 | Os1-B3  | 2.292 | 2.267 | 0.417 |
| Os1-B5  | 2.209 | 2.250 | 0.404 | Os1-B1  | 2.213 | 2.221 | 0.419 |
| Os1-B6  | 2.198 | 2.239 | 0.446 | Os1-B4  | 2.191 | 2.205 | 0.599 |
| B1-B2   | 1.770 | 1.813 | 0.543 | Os2-B5  | 2.209 | 2.136 | 0.843 |
| B2-B3   | 1.799 | 1.810 | 0.553 | Os2-B6  | 2.201 | 2.069 | 0.514 |
| B3-B4   | 1.743 | 1.763 | 0.598 | B2-B3   | 1.790 | 1.810 | 0.575 |
| B4-B5   | 1.754 | 1.788 | 0.527 | B2-B1   | 1.761 | 1.829 | 0.577 |
| B5-B6   | 1.735 | 1.763 | 0.598 | B2-B6   | 1.762 | 1.824 | 0.518 |
| B6-B1   | 1.797 | 1.810 | 0.553 | B1-B6   | 1.721 | 1.812 | 0.560 |
| B3-B7   | 1.961 | 1.957 | 0.475 | B3-B4   | 1.758 | 1.765 | 0.631 |
| B6-B9   | 1.948 | 1.957 | 0.476 | B3-B5   | 1.763 | 1.773 | 0.577 |
| B4-B8   | 1.758 | 1.800 | 0.507 | B4-B5   | 1.722 | 1.758 | 0.610 |
| B5-B8   | 1.795 | 1.800 | 0.507 |         |       |       |       |
| B4-B7   | 1.751 | 1.773 | 0.558 |         |       |       |       |
| B7-B10  | 1.774 | 1.802 | 0.542 |         |       |       |       |
| B7-B8   | 1.729 | 1.788 | 0.536 |         |       |       |       |
| B9-B8   | 1.754 | 1.788 | 0.542 |         |       |       |       |
| B8-B10  | 1.690 | 1.729 | 0.596 |         |       |       |       |
| B9-B10  | 1.777 | 1.788 | 0.542 |         |       |       |       |
| 3/3'    |       |       |       | 4/4'    |       |       |       |
|         | Expt. | Cal.  | WBI   |         | Expt. | Cal.  | WBI   |
| Os1-Os2 | 2.778 | 2.798 | 0.379 | Os1-Os2 | 2.785 | 2.758 | 0.386 |
| Os2-Os3 | 2.779 | 2.779 | 0.363 | Os2-Os3 | 2.716 | 2.720 | 0.357 |
| Os3-Os1 | 2.784 | 2.795 | 0.383 | Os3-Os1 | 2.796 | 2.759 | 0.383 |
| Os1-B4  | 2.185 | 2.184 | 0.520 | Os3-B5  | 2.115 | 2.188 | 0.551 |
| Os1-B5  | 2.175 | 2.185 | 0.515 | Os3-B1  | 2.055 | 2.216 | 0.538 |
| Os1-B1  | 2.201 | 2.181 | 0.520 | Os2-B1  | 2.033 | 2.212 | 0.552 |

|        |       |       |       |        |       |       |       |
|--------|-------|-------|-------|--------|-------|-------|-------|
| Os1-B2 | 2.184 | 2.183 | 0.515 | Os2-B5 | 2.148 | 2.218 | 0.531 |
| Os2-B2 | 2.174 | 2.203 | 0.489 | Os1-B2 | 2.146 | 2.150 | 0.563 |
| Os2-B3 | 2.188 | 2.191 | 0.453 | Os1-B3 | 2.168 | 2.148 | 0.566 |
| Os2-B5 | 2.175 | 2.201 | 0.489 | Os3-B3 | 2.132 | 2.214 | 0.485 |
| Os2-B6 | 2.189 | 2.174 | 0.453 | Os1-B5 | 2.202 | 2.083 | 0.737 |
| Os3-B1 | 2.187 | 2.203 | 0.484 | Os2-B4 | 2.239 | 2.213 | 0.405 |
| Os3-B3 | 2.175 | 2.188 | 0.454 | Os2-B2 | 2.117 | 2.200 | 0.497 |
| Os3-B4 | 2.191 | 2.203 | 0.484 | Os3-B4 | 2.262 | 2.224 | 0.485 |
| Os3-B6 | 2.191 | 2.187 | 0.454 | B4-B2  | 1.684 | 1.742 | 0.631 |
| B1-B2  | 1.731 | 1.742 | 0.601 | B4-B3  | 1.687 | 1.739 | 0.638 |
| B2-B3  | 1.706 | 1.743 | 0.640 | B4-B1  | 1.818 | 1.726 | 0.653 |
| B3-B1  | 1.706 | 1.741 | 0.642 |        |       |       |       |
| B4-B5  | 1.695 | 1.741 | 0.601 |        |       |       |       |
| B5-B6  | 1.698 | 1.743 | 0.640 |        |       |       |       |
| B6-B4  | 1.706 | 1.744 | 0.642 |        |       |       |       |

**Table S2.** Calculated  $^{11}\text{B}$  chemical shifts for **1'-4'** (The experimental values are provided in parentheses).

| Cluster              | Calculated $^{11}\text{B}$ chemical shifts (ppm)                  |
|----------------------|-------------------------------------------------------------------|
| <b>1</b>             | 20.1 (15.7), 11.51 (12.8), 6.68 (4.9), 1.79 (-0.7), -43.2 (-43.9) |
| <b>2<sup>a</sup></b> | 33.4, 6.2, -24.1                                                  |
| <b>3</b>             | 65.48 (63.8), 42.40 (37.3)                                        |
| <b>4</b>             | 67.34 (92.8), 44.63 (57.8), -20.4 (-10.7)                         |

<sup>a</sup>Note that, in case of cluster **2**, as the structure was optimized with two B-H-B and two Os-H-B (shown in Figure S36), the DFT study shows three  $^{11}\text{B}$  peaks as expected.

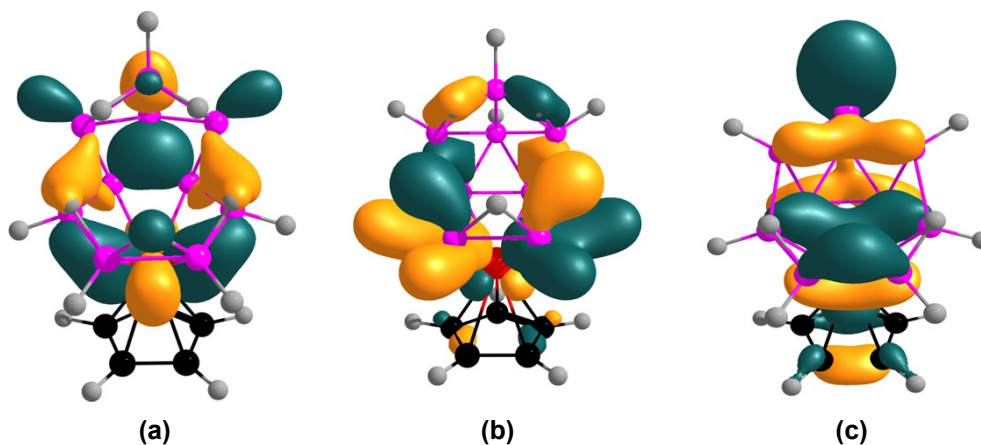

**Figure S38.** Selected molecular orbitals of **1**. (a) HOMO-2, (b) HOMO-12, (c) HOMO-13 of **1**. Isosurfaces are plotted at an isovalue of  $\pm 0.04$  ( $e/\text{bohr}^3$ )<sup>1/2</sup>.

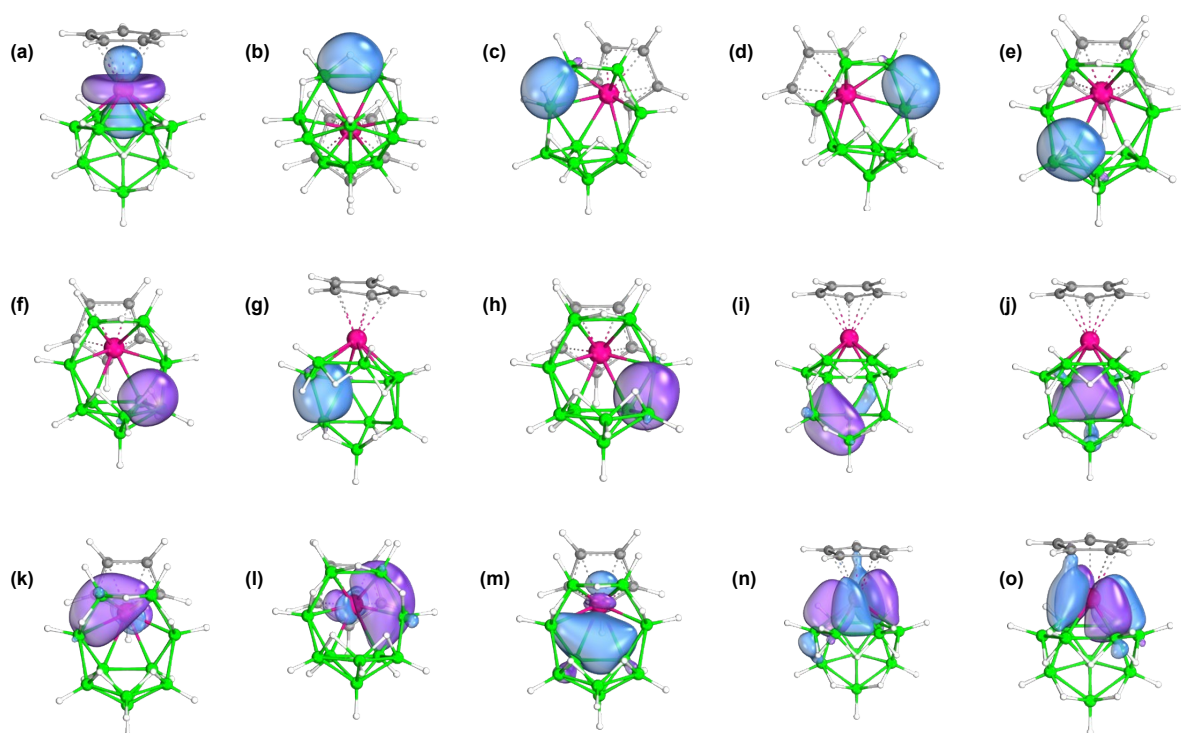

**Figure S39.** Selected localized orbitals of **1** computed using IBOview: (a) a 1c-2e lone pair on osmium; (b-h) five 3c-2e B-H-B bond orbitals and two 3C-2e B-B-B bond orbitals; and (i-o) multicenter osmium-boron and boron-boron bonding orbitals.

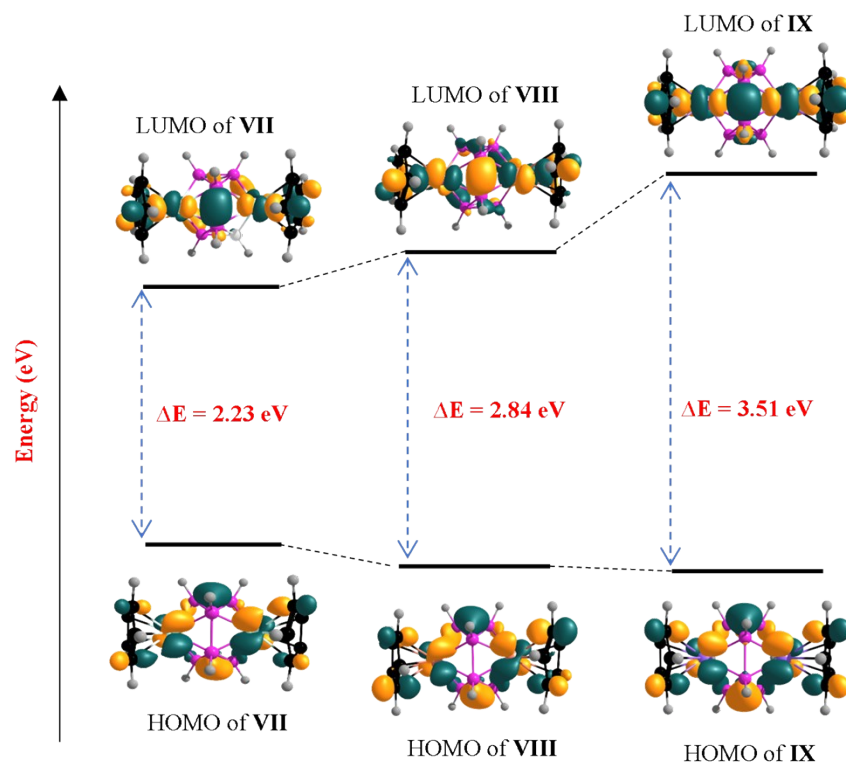

**Figure S40.** Frontier molecular orbitals and their respective energy levels for VII-IX. Isosurfaces are plotted at an isovalue of  $\pm 0.04 \text{ (e/bohr}^3)^{1/2}$  ( $\Delta E = \text{HOMO-LUMO energy gap}$ ).

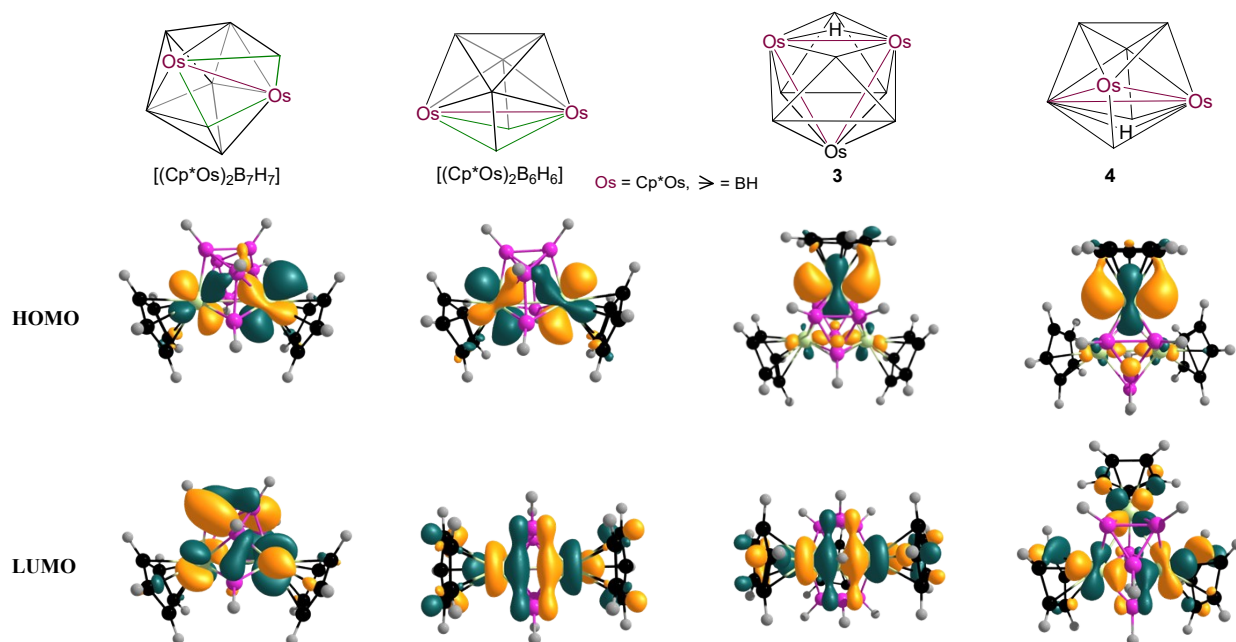

**Figure S41.** Frontier molecular orbitals of  $[(\text{Cp}^*\text{Os})_2\text{B}_7\text{H}_7]$ ,  $[(\text{Cp}^*\text{Os})_2\text{B}_6\text{H}_6]$ , **3**, and **4**.

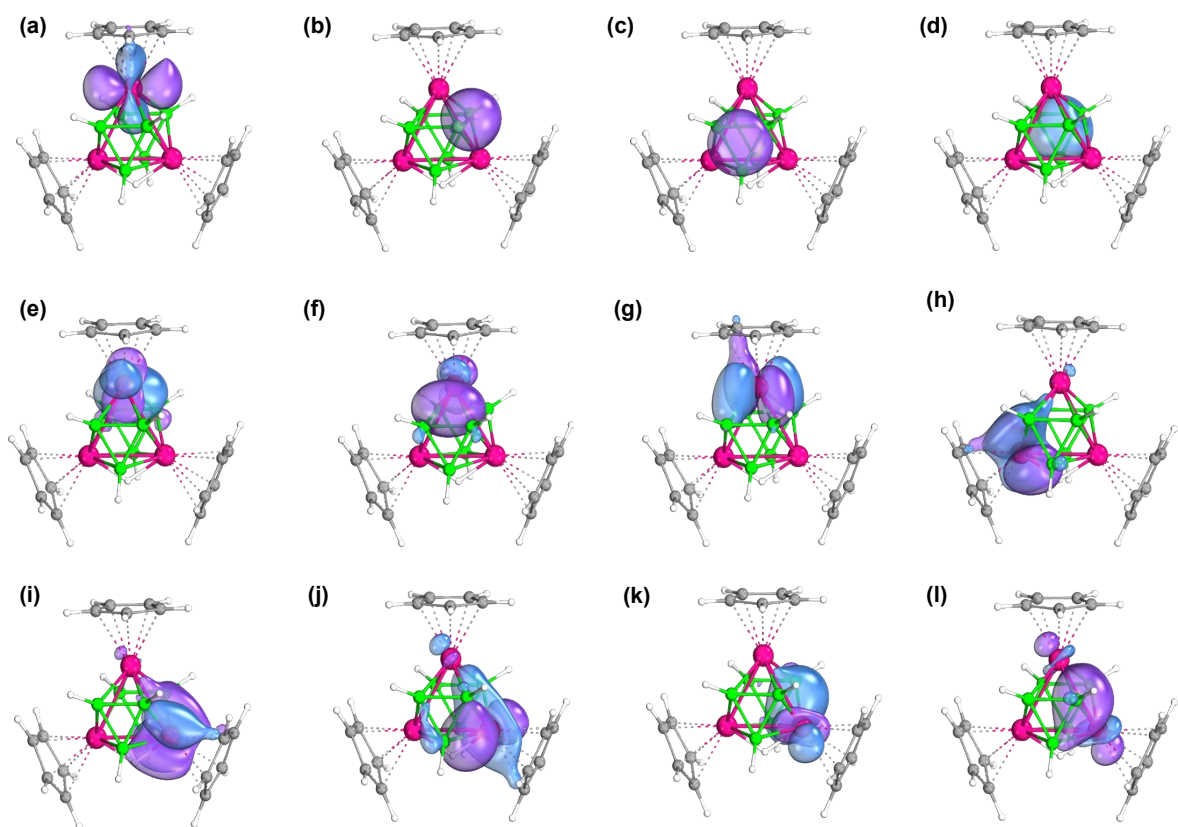

**Figure S42.** Selected localized orbitals of **3**: (a) a 1c-2e lone pair on osmium; (b) a 2c-2e B-H bond; (c-d) two 3c-2e B-B-B bond orbitals; and (e-l) multicenter osmium-boron and boron-boron bonding orbitals.

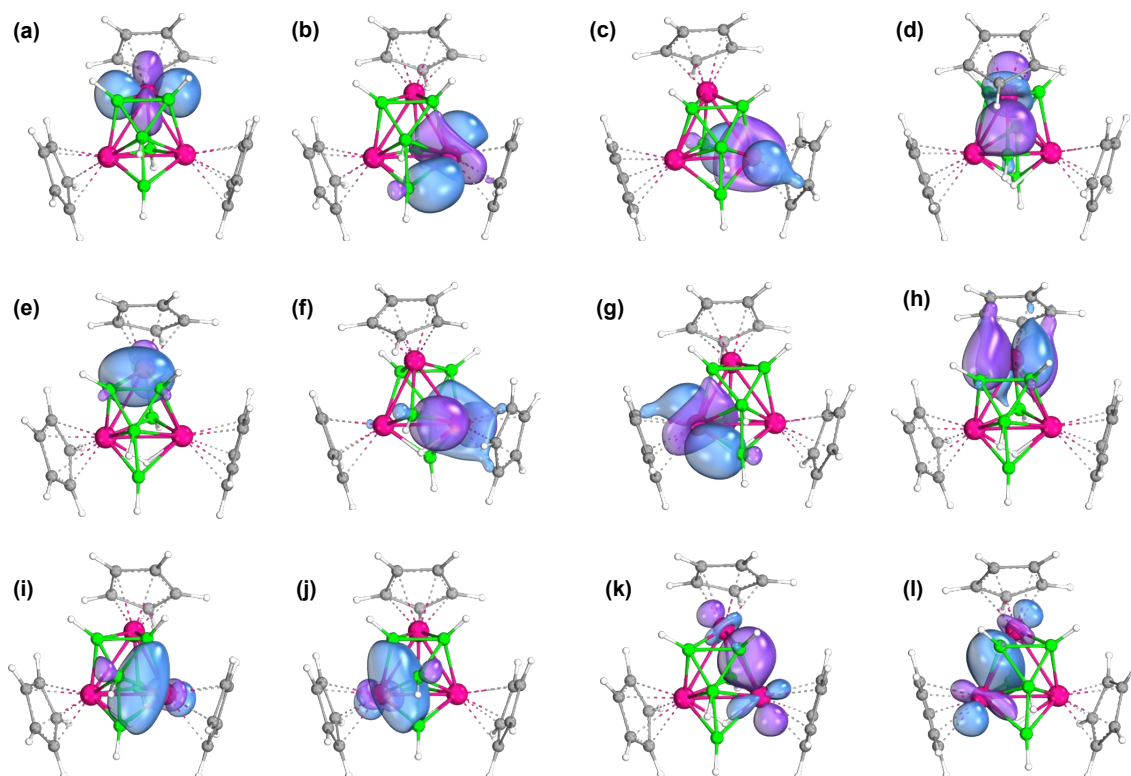

**Figure S43.** Selected localized orbitals of **4**: (a) a 1c-2e lone pair on osmium; (b-d) three 2c-2e Os-B bonding orbitals; (e) a 3c-2e Os-B-B bond orbital; and (f-l) multicenter osmium-boron and boron-boron bonding orbitals.

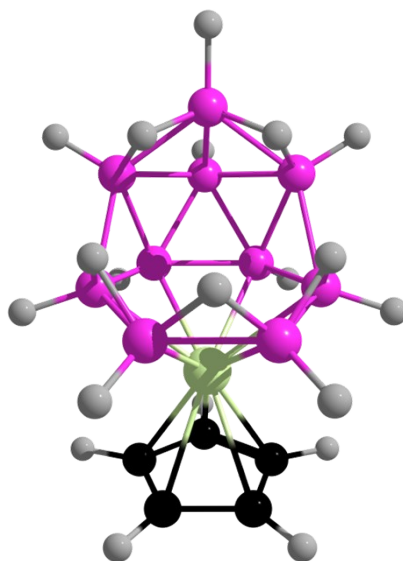

**Figure S44.** Optimized geometry of **1'**

T. E. = - 541.6766731 a. u.

Cartesian coordinates for the calculated structure of **1'** (in Å).

|    |              |              |              |   |              |              |              |
|----|--------------|--------------|--------------|---|--------------|--------------|--------------|
| B  | 0.304848000  | -0.904406000 | 1.897274000  | H | 4.916759000  | 0.000194000  | 0.352401000  |
| B  | 0.304789000  | 0.909435000  | 1.894738000  | H | 3.365462000  | 2.469988000  | -0.458578000 |
| B  | 0.934753000  | 1.748268000  | 0.419018000  | H | -0.347792000 | -1.494671000 | 2.733118000  |
| B  | 1.273724000  | 0.892638000  | -1.084944000 | H | 3.374490000  | -0.003158000 | -2.381544000 |
| B  | 1.273589000  | -0.895371000 | -1.082810000 | H | 0.947440000  | 1.590312000  | -2.026256000 |
| B  | 0.934596000  | -1.746860000 | 0.423534000  | H | 1.419609000  | -1.628408000 | 1.682141000  |
| B  | 2.744170000  | 1.450545000  | -0.265715000 | H | 0.947192000  | -1.595427000 | -2.022316000 |
| B  | 2.820257000  | -0.001751000 | -1.307309000 | H | 3.182290000  | 0.979488000  | 0.923444000  |
| B  | 2.743954000  | -1.451493000 | -0.262113000 | H | -0.347780000 | 1.501918000  | 2.729073000  |
| B  | 3.723113000  | 0.000016000  | 0.168033000  | H | 0.554336000  | 2.900433000  | 0.369032000  |
| C  | -2.594161000 | -0.717949000 | 0.435992000  | H | 1.042366000  | 0.003424000  | 2.599661000  |
| C  | -2.593722000 | 0.721463000  | 0.432251000  | H | 1.419882000  | 1.632610000  | 1.677802000  |
| C  | -2.185786000 | 1.162723000  | -0.874922000 | H | 0.554114000  | -2.899155000 | 0.376641000  |
| C  | -1.937630000 | -0.003940000 | -1.677487000 | H | -2.085306000 | -2.210190000 | -1.191288000 |
| C  | -2.186510000 | -1.166254000 | -0.868869000 | H | -1.602129000 | -0.006770000 | -2.722340000 |
| Os | -0.425891000 | 0.000187000  | 0.090176000  | H | -2.084011000 | 2.204905000  | -1.202790000 |
| H  | 3.365135000  | -2.471416000 | -0.452806000 | H | -2.868970000 | 1.369201000  | 1.273981000  |
| H  | 3.182268000  | -0.977718000 | 0.925820000  | H | -2.869735000 | -1.361127000 | 1.281105000  |

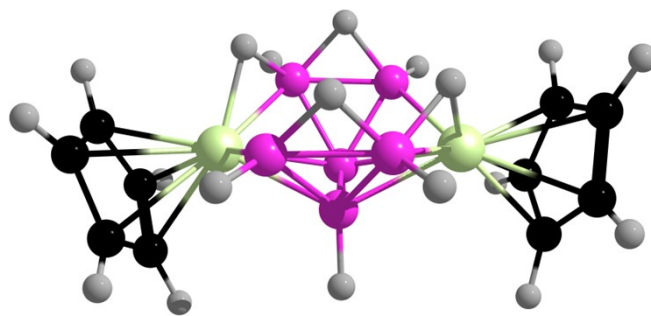

**Figure S45.** Optimized geometry of **2'**

T. E. = -723.5174469 a. u.

Cartesian coordinates for the calculated structure of **2'** (in Å).

|    |              |              |              |   |              |              |              |
|----|--------------|--------------|--------------|---|--------------|--------------|--------------|
| Os | 1.974065000  | 0.150996000  | -0.072950000 | H | -0.046583000 | 2.222059000  | -1.499209000 |
| Os | -1.949359000 | 0.018757000  | -0.169329000 | H | -1.589903000 | 2.891178000  | -0.449776000 |
| C  | 3.399914000  | -0.095698000 | 1.567113000  | H | 1.345806000  | 3.048573000  | -0.399952000 |
| C  | 4.004732000  | 0.846788000  | 0.622037000  | H | 0.165964000  | -1.603575000 | -1.927724000 |
| C  | 4.253801000  | 0.149145000  | -0.597980000 | H | 1.496531000  | -2.733222000 | -0.874669000 |
| C  | 3.801063000  | -1.201904000 | -0.436320000 | H | 0.026270000  | -1.532403000 | 1.547360000  |
| C  | 3.311530000  | -1.371246000 | 0.917090000  | H | -1.272981000 | -2.730608000 | -1.078557000 |
| C  | -3.317133000 | -0.202844000 | 1.657605000  | H | -1.499040000 | -0.558377000 | -1.733202000 |
| C  | -3.650698000 | -1.323564000 | 0.823743000  | H | 1.684230000  | 1.297225000  | -1.394130000 |
| C  | -4.143910000 | -0.811189000 | -0.417637000 | H | 2.928459000  | -2.298873000 | 1.357815000  |
| C  | -4.199909000 | 0.627919000  | -0.340047000 | H | 3.837961000  | -1.981398000 | -1.205636000 |
| C  | -3.687661000 | 1.005853000  | 0.944127000  | H | 4.672385000  | 0.579936000  | -1.516281000 |
| B  | -0.029322000 | 0.868913000  | 0.646562000  | H | 4.205098000  | 1.909595000  | 0.812240000  |
| B  | -1.010917000 | 1.821476000  | -0.561252000 | H | 3.118098000  | 0.121038000  | 2.606009000  |
| B  | 0.795352000  | 1.969415000  | -0.560720000 | H | -2.921806000 | -0.250921000 | 2.680280000  |
| B  | 0.948554000  | -1.652296000 | -0.823129000 | H | -3.494637000 | -2.381262000 | 1.070228000  |
| B  | 0.001764000  | -0.934058000 | 0.482555000  | H | -4.451061000 | -1.413585000 | -1.282763000 |
| B  | -0.805890000 | -1.612049000 | -0.942841000 | H | -4.578128000 | 1.304571000  | -1.115807000 |
| H  | -0.032608000 | 1.131882000  | 1.844908000  | H | -3.599816000 | 2.030349000  | 1.327768000  |

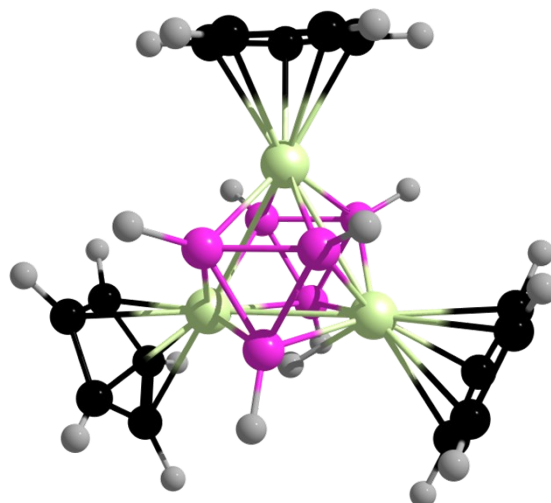

**Figure S46.** Optimized geometry of **3'**

T. E. = -1006.1239080 a. u.

Cartesian coordinates for the calculated structure of **3'** (in Å).

|    |              |              |              |   |              |              |              |
|----|--------------|--------------|--------------|---|--------------|--------------|--------------|
| Os | 1.974065000  | 0.150996000  | -0.072950000 | H | -0.046583000 | 2.222059000  | -1.499209000 |
| Os | -1.949359000 | 0.018757000  | -0.169329000 | H | -1.589903000 | 2.891178000  | -0.449776000 |
| C  | 3.399914000  | -0.095698000 | 1.567113000  | H | 1.345806000  | 3.048573000  | -0.399952000 |
| C  | 4.004732000  | 0.846788000  | 0.622037000  | H | 0.165964000  | -1.603575000 | -1.927724000 |
| C  | 4.253801000  | 0.149145000  | -0.597980000 | H | 1.496531000  | -2.733222000 | -0.874669000 |
| C  | 3.801063000  | -1.201904000 | -0.436320000 | H | 0.026270000  | -1.532403000 | 1.547360000  |
| C  | 3.311530000  | -1.371246000 | 0.917090000  | H | -1.272981000 | -2.730608000 | -1.078557000 |
| C  | -3.317133000 | -0.202844000 | 1.657605000  | H | -1.499040000 | -0.558377000 | -1.733202000 |
| C  | -3.650698000 | -1.323564000 | 0.823743000  | H | 1.684230000  | 1.297225000  | -1.394130000 |
| C  | -4.143910000 | -0.811189000 | -0.417637000 | H | 2.928459000  | -2.298873000 | 1.357815000  |
| C  | -4.199909000 | 0.627919000  | -0.340047000 | H | 3.837961000  | -1.981398000 | -1.205636000 |
| C  | -3.687661000 | 1.005853000  | 0.944127000  | H | 4.672385000  | 0.579936000  | -1.516281000 |
| B  | -0.029322000 | 0.868913000  | 0.646562000  | H | 4.205098000  | 1.909595000  | 0.812240000  |
| B  | -1.010917000 | 1.821476000  | -0.561252000 | H | 3.118098000  | 0.121038000  | 2.606009000  |
| B  | 0.795352000  | 1.969415000  | -0.560720000 | H | -2.921806000 | -0.250921000 | 2.680280000  |
| B  | 0.948554000  | -1.652296000 | -0.823129000 | H | -3.494637000 | -2.381262000 | 1.070228000  |
| B  | 0.001764000  | -0.934058000 | 0.482555000  | H | -4.451061000 | -1.413585000 | -1.282763000 |
| B  | -0.805890000 | -1.612049000 | -0.942841000 | H | -4.578128000 | 1.304571000  | -1.115807000 |
| H  | -0.032608000 | 1.131882000  | 1.844908000  | H | -3.599816000 | 2.030349000  | 1.327768000  |

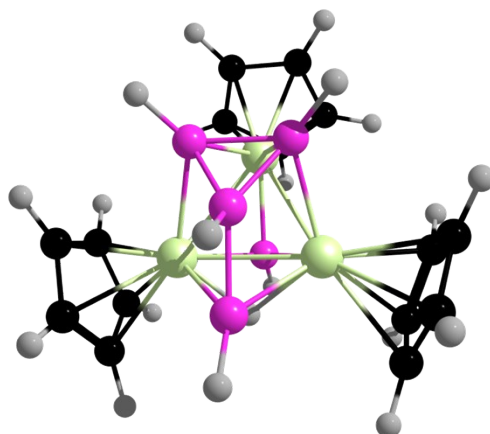

**Figure S47.** Optimized geometry of **4'**

T. E. = -980.6683821 a. u.

Cartesian coordinates for the calculated structure of **4'** (in Å).

|    |              |              |              |   |              |              |              |
|----|--------------|--------------|--------------|---|--------------|--------------|--------------|
| C  | -1.170513000 | 3.362450000  | 0.669493000  | C | -3.351754000 | -0.133125000 | 0.838505000  |
| C  | -0.687230000 | 3.637148000  | -0.658370000 | C | 2.950551000  | -0.966449000 | 1.650067000  |
| C  | 0.756367000  | 3.627243000  | -0.622091000 | C | 2.801294000  | -2.286256000 | 1.103156000  |
| C  | -0.024630000 | 3.187218000  | 1.525895000  | C | 3.184550000  | -2.240833000 | -0.285647000 |
| Os | 0.001870000  | 1.546009000  | -0.106643000 | C | 3.577469000  | -0.892889000 | -0.599528000 |
| B  | -0.008590000 | -2.419301000 | -0.839700000 | C | 3.421188000  | -0.105023000 | 0.597098000  |
| B  | -0.905087000 | 0.497282000  | -1.750357000 | H | 2.750555000  | -0.667206000 | 2.685449000  |
| B  | 0.899677000  | 0.492950000  | -1.749755000 | H | 3.621923000  | 0.968705000  | 0.684424000  |
| B  | -0.003890000 | -0.992732000 | -1.811506000 | H | 3.933733000  | -0.527829000 | -1.569896000 |
| H  | 0.010789000  | -2.009864000 | -2.540969000 | H | 3.196853000  | -3.091120000 | -0.978465000 |
| B  | 0.013610000  | 0.094275000  | 1.387638000  | H | 2.468726000  | -3.177812000 | 1.649437000  |
| Os | -1.365324000 | -0.849416000 | -0.071997000 | H | -3.984415000 | -0.146475000 | -1.339965000 |
| Os | 1.354943000  | -0.858521000 | -0.054936000 | H | -3.496673000 | 0.914537000  | 1.125255000  |
| H  | -0.004990000 | -3.625783000 | -0.892693000 | H | -2.614702000 | -1.077659000 | 2.757798000  |
| H  | -1.686451000 | 0.882284000  | -2.602928000 | H | -2.501620000 | -3.377415000 | 1.289703000  |
| H  | 1.702662000  | 0.865195000  | -2.587737000 | H | -3.334500000 | -2.798211000 | -1.245850000 |
| H  | 0.003032000  | 0.006958000  | 2.601376000  | H | 2.199043000  | 3.309736000  | 1.094538000  |
| C  | 1.165415000  | 3.346688000  | 0.728803000  | H | 1.424626000  | 3.812991000  | -1.471894000 |
| C  | -2.876864000 | -1.184068000 | 1.698543000  | H | -1.309109000 | 3.828352000  | -1.541576000 |
| C  | -2.812214000 | -2.390629000 | 0.924438000  | H | -2.222351000 | 3.344256000  | 0.980230000  |
| C  | -3.251725000 | -2.085395000 | -0.416106000 | H | -0.053117000 | 2.983676000  | 2.603237000  |
| C  | -3.595127000 | -0.687603000 | -0.469854000 | H | 0.043590000  | -1.603981000 | 0.764275000  |
